# Supplementary material for: Carbene-catalyzed synthesis of a fluorophosphate cathode
Source: Royal Society of Chemistry journal article supplement (doi:10.1039/d4ee00983e), 2024-01-01
Supplement: d4ee00983e1.pdf [file d4ee00983e1.pdf]

1  
2 **Supplementary information for**

3 **Carbene catalyzed synthesis of fluorophosphate cathode**

4 Qingfeng Fu<sup>a,†</sup>, Wang Zhou<sup>a,†</sup>, Peng Gao<sup>a,†</sup>, Hongliang Dong<sup>b,c</sup>, Shi Chen<sup>d</sup>, Changling Fan<sup>a,\*</sup>,  
5 Jilei Liu<sup>a,\*</sup>

6 <sup>a</sup> College of Materials Science and Engineering, Hunan Joint International Laboratory of  
7 Advanced Materials and Technology for Clean Energy, Hunan Province Key Laboratory for  
8 Advanced Carbon Materials and Applied Technology, Hunan University, Changsha 410082,  
9 China

10 <sup>b</sup> Center for High Pressure Science and Technology Advanced Research, Pudong, Shanghai  
11 201203, China

12 <sup>c</sup> State Key Laboratory of High Performance Ceramics and Superfine Microstructure, Shanghai  
13 Institute of Ceramics, Chinese Academy of Sciences, Shanghai 201899, China

14 <sup>d</sup> Joint Key Laboratory of the Ministry of Education, Institute of Applied Physics and Materials  
15 Engineering, University of Macau, Macau, 999078 China

16  
17  
18 Corresponding author. E-mail address: liujilei@hnu.edu.cn (Jilei Liu); fancl@hnu.edu.cn.  
19 <sup>†</sup>Qingfeng Fu, Wang Zhou and Peng Gao contributed equally to this work.

20  
21  
22 **The PDF file includes:**

23  
24 Supplementary Text  
25 Figs. S1 to S52  
26 Tables S1 to S4  
27 References  
28  
29  
30  
31  
32

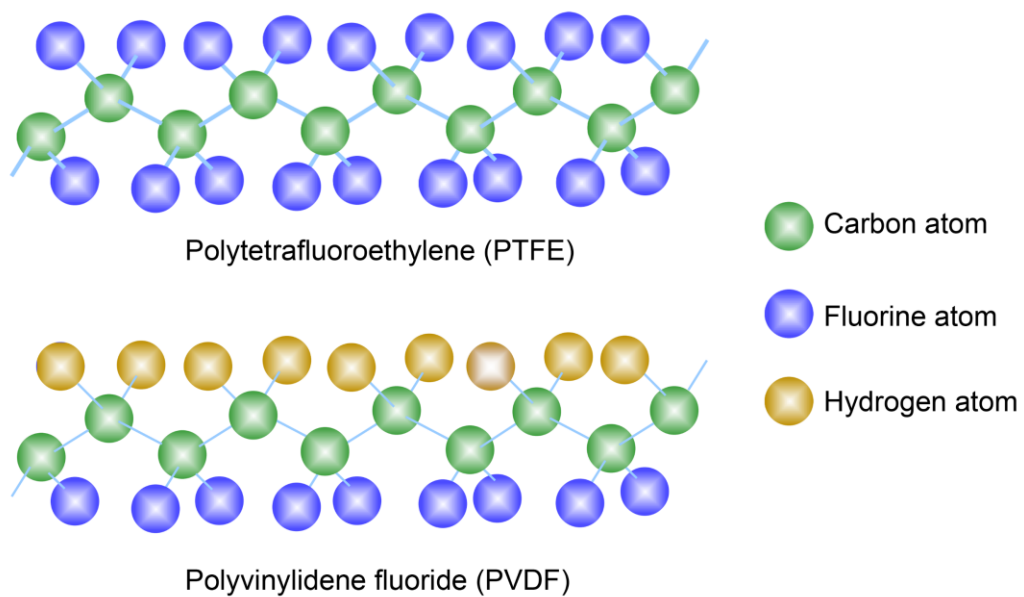

33

34 **Fig. S1.** Chemical molecular formula and abbreviation of polytetrafluoroethylene (PTFE) and polyvinylidene  
 35 fluoride (PVDF).  
 36

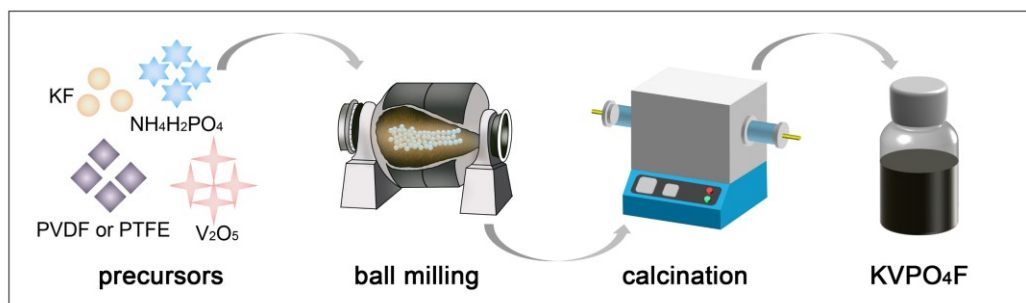

37

38 **Fig. S2.** Process for the preparation of KVPO<sub>4</sub>F using a scalable one-step solid-state reaction process.  
 39

40

### Supplementary Note 1:

The influences of different amount PVDF/PTFE on phase purity of as-prepared samples were also investigated by using a series of structural and spectroscopic characterization techniques. The photo images of as-prepared samples with addition of different amount PVDF/PTFE are shown in **Fig. S3**. No solid particles were formed after calcination without PVDF/PTFE addition, which is likely due to the volatilization of  $V_2O_5$  at temperatures higher than  $700\text{ }^\circ\text{C}$ .<sup>1</sup> It is noteworthy that the  $V_2O_5$  is easy to volatilize when calcined at higher temperatures because of its low melting point and high saturated vapor pressure. The only way to prevent the volatilization of  $V_2O_5$  is to reduce it to  $VO_2$  or  $V_2O_3$ .<sup>1</sup> Therefore, the success of one-step solid-phase sintering process requires the use of reducing agents during the synthesis. The XRD patterns of as-synthesized samples calcined at  $750\text{ }^\circ\text{C}$  with different adding amounts of PVDF/PTFE are shown in **Fig. S4a** and **Fig. S4b**. The unknown impurities are present with 5wt% adding amounts of both PVDF and PTFE despite their different peak positions, which is likely due to their different reaction pathways. After increasing the amount of PVDF/PTFE to 15wt% and 25wt%, the impurities are disappeared and all diffraction peaks can be well indexed to the orthorhombic  $Pna2_1$  space group of  $KTiOPO_4$  (ICDD Card No. 78-1342) for both samples. However, further increment of the PVDF/PTFE amount to 35wt% results in the re-emergence of impurity peaks, thus implying that appropriate amounts of PVDF/PTFE addition are necessary to obtain phase-pure  $KVPO_4F$ . Considering the cost of material production, the optimum adding amount of PVDF/PTFE is determined to be 15 wt%.

The influences of PVDF and PTFE on morphologies of as-prepared samples are further revealed by SEM images (**Fig. 2i** and **Fig. S5**). Clearly, the sample prepared with 5wt% PVDF addition is composed of closely-packed nanosheets and dense structure, whereas increasing PVDF content results in “house-of-cards” stacking of thinner nanosheets and larger exposed surface area, which is due to the decomposition of PVDF into gaseous substances during calcination and therefore is beneficial to the infiltration of electrolytes. In contrast, large-sized agglomerates with smooth surface were observed for the samples prepared with PTFE, thus further confirms the absence of porous structure (**Fig. S6**).

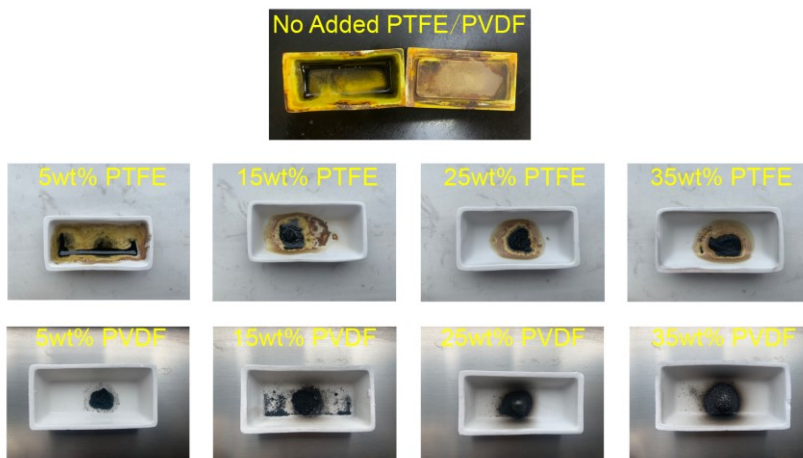

**Fig. S3.** Photo images of as-prepared samples with addition of different amount PVDF/PTFE.

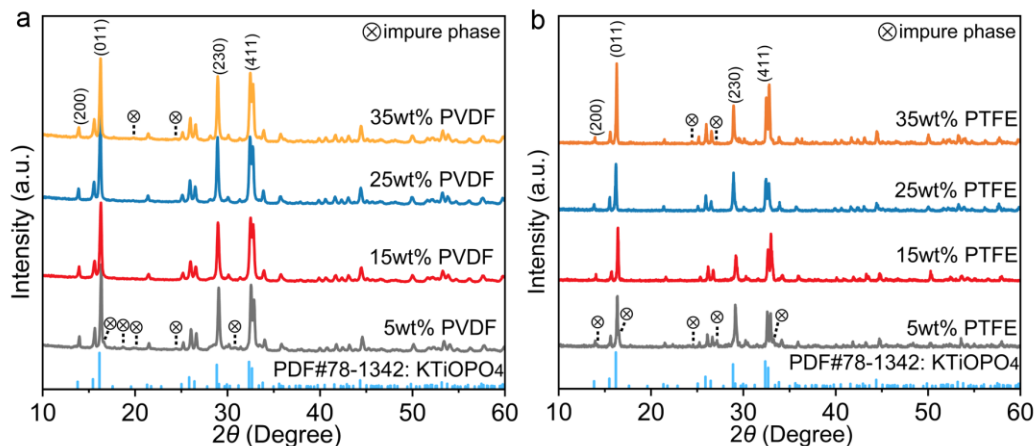

**Fig. S4.** XRD patterns of  $KVPO_4F$  with addition of different amount (a) PVDF and (b) PTFE.

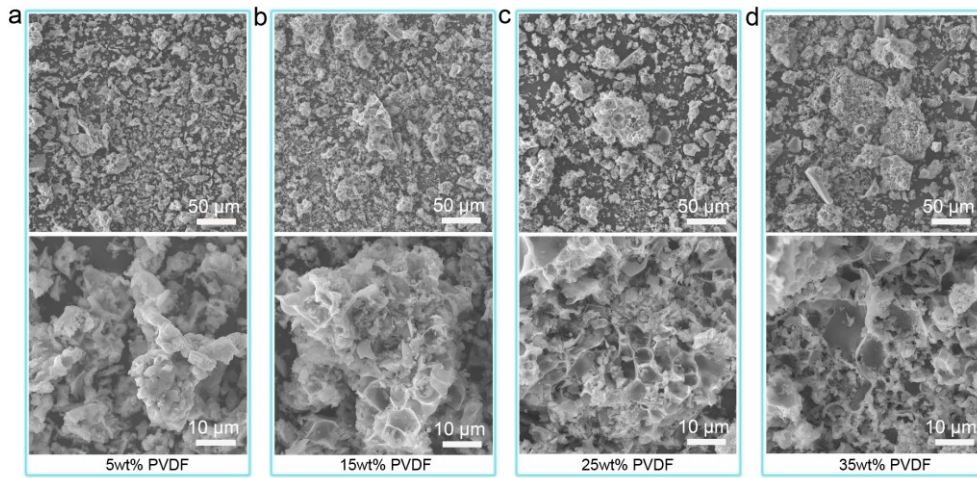

Fig. S5. The SEM images with addition of different amount PVDF.

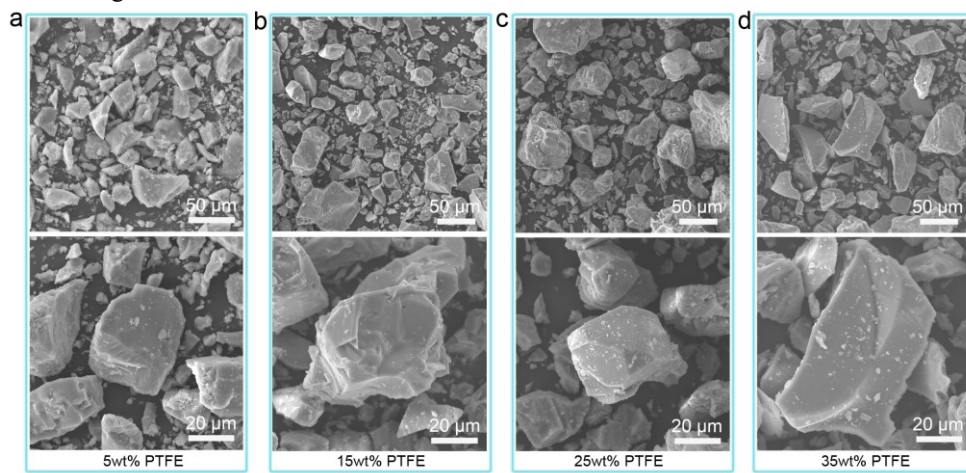

Fig. S6. The SEM images with addition of different amount PTFE.

69  
70

71  
72  
73



74  
75  
76  
77  
78  
79  
80  
81  
82  
83  
84

### Supplementary Note 2:

KVPF-CTR was synthesized using a well-known two-step carbothermal reduction (CTR) method based on previous researches,<sup>2-5</sup> and the schematic is shown in **Fig. S7**. In the first step,  $VPO_4$  was obtained by ball milling  $V_2O_5$ ,  $NH_4H_2PO_4$ , and acetylene black for 6 hours, followed by heat-treatment at  $750\text{ }^\circ\text{C}$  for 6 hours under Ar flow in a tube furnace with a ramp of  $10\text{ }^\circ\text{C min}^{-1}$  (**Fig. S7c**). In the second step, stoichiometric amounts of KF and the as-synthesized  $VPO_4/C$  powders were homogeneously mixed and sintered at  $750\text{ }^\circ\text{C}$  for 3 hours with Ar flow to obtain the black  $KVPO_4F$  powders (**Fig. S7d**). Temperature dependent *ex-situ* XRD results show that the  $KVPO_4F$  material starts to form when the temperature is raised to  $550\text{ }^\circ\text{C}$  and the crystallinity becomes stronger at  $750\text{ }^\circ\text{C}$ . The color, morphology, specific surface area and porous structure of the  $VPO_4$  (**Fig. S7a, b**) and the KVPF-CTR (**Fig. S7g-i**) samples are almost the same.

Moreover,  $KVOPO_4$  and  $K_2VOP_2O_7$  were also synthesized by using a solid-state reaction method (**Fig. S8**).

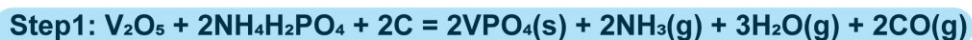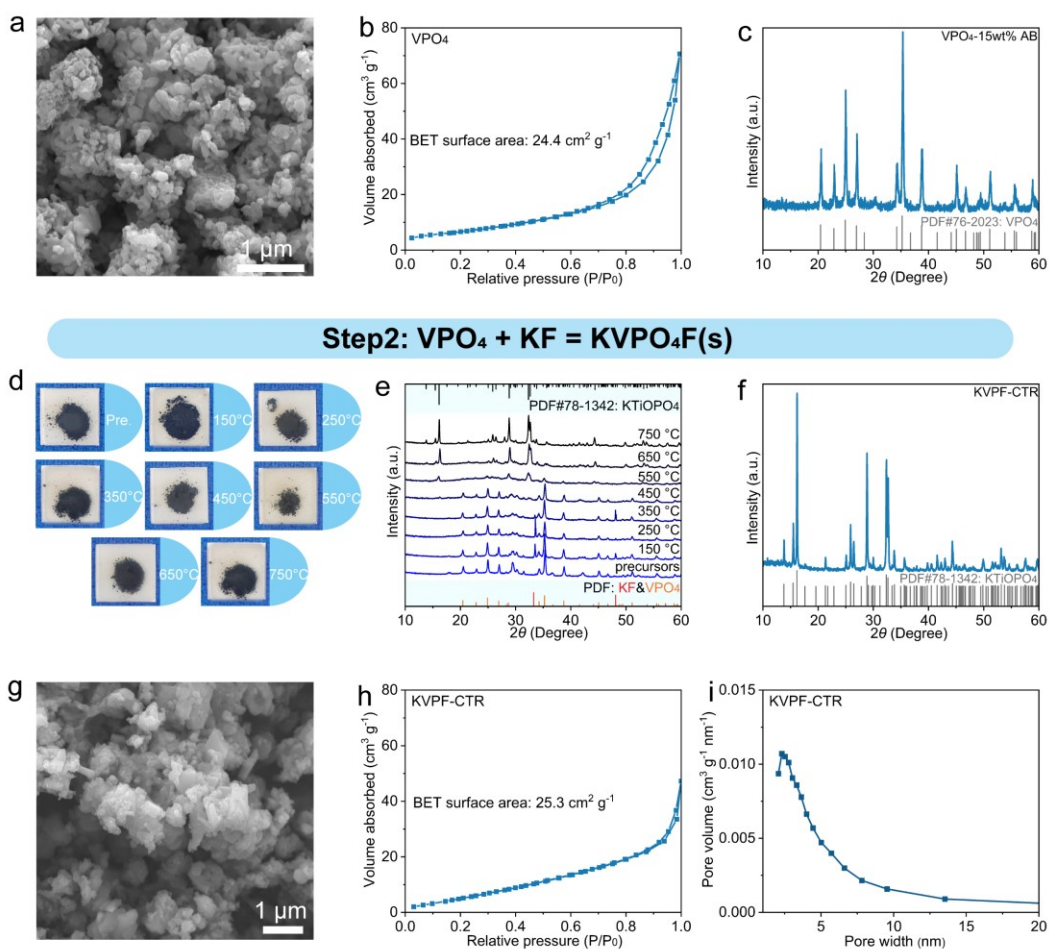

85  
86  
87  
88  
89

**Fig. S7.** (a) SEM, (b)  $N_2$  adsorption-desorption isotherm and (c) XRD pattern of  $VPO_4$ . (d) Photo images and (e) XRD patterns of as-prepared KVPF-CTR samples with different calcination temperatures. (f) XRD patterns of KVPF-CTR. (g) SEM of KVPF-CTR. (h)  $N_2$  adsorption-desorption isotherm and (i) pore size distributions of KVPF-CTR.

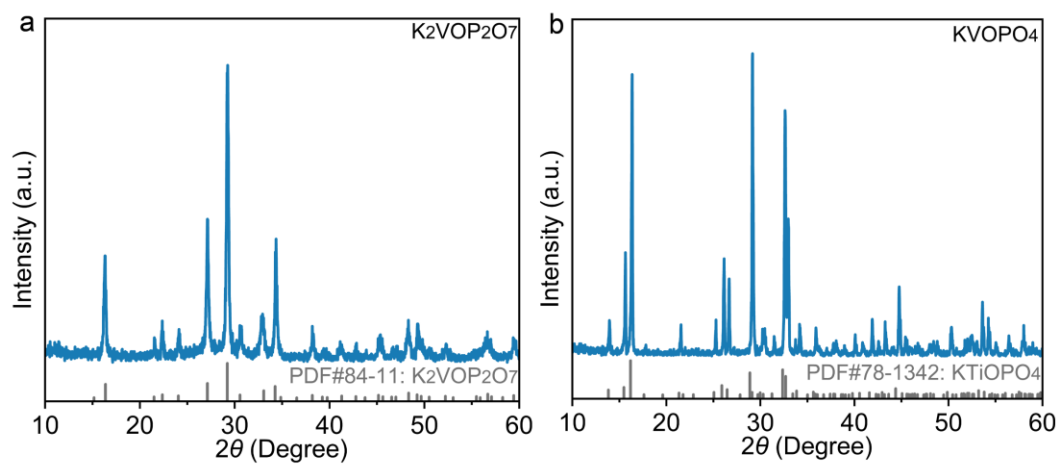

**Fig. S8.** XRD patterns of (a)  $K_2VOP_2O_7$  and (b)  $KVOPO_4$ .

90  
91  
92  
93

94  
95  
96  
97  
98  
99  
100  
101  
102

### Supplementary Note 3:

The Rietveld refinements for XRD patterns of both KVPF-PVDF and KVPF-PTFE were performed based on the reported structure model of  $\text{KTiOPO}_4$  (Fig. 2a and Fig. S9). The refined parameters are summarized in Table S1 and S2. All bond lengths in KVPF-PVDF are within 2 Å, which is consistent with the usual quasi-symmetric octahedral structure of  $\text{V}^{3+}$  (inset of Fig. 2e). The structure of KVPF-PTFE adopts similar structures built on  $\text{VO}_4\text{X}_2$  (X is most likely O) octahedra and  $\text{PO}_4$  tetrahedra (Fig. 2g). In particular, the noncentrosymmetric  $\text{VO}_4\text{X}_2$  (X is most likely O) octahedra of KVPF-PTFE have highly covalent vanadium-type bonds ( $\text{V}^{4+}=\text{O}$ ) that result in both short and long V–O bonds.

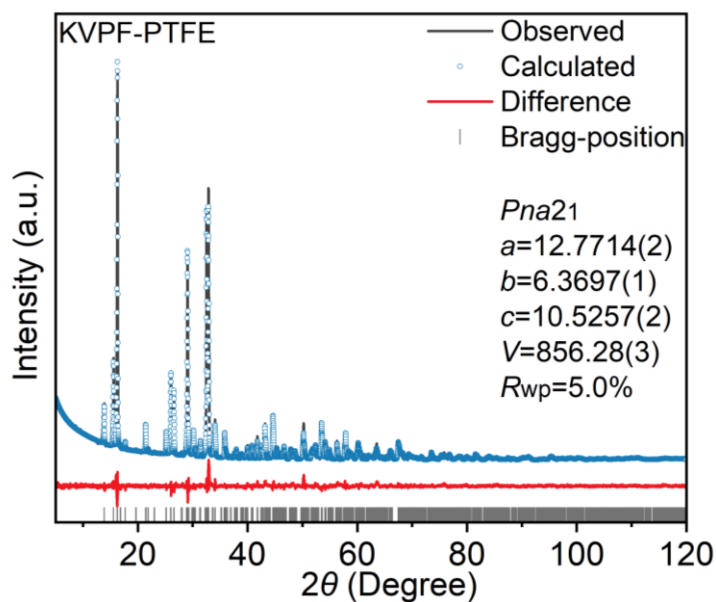

103  
104

Fig. S9. Rietveld refinement spectrum of KVPF-PTFE.

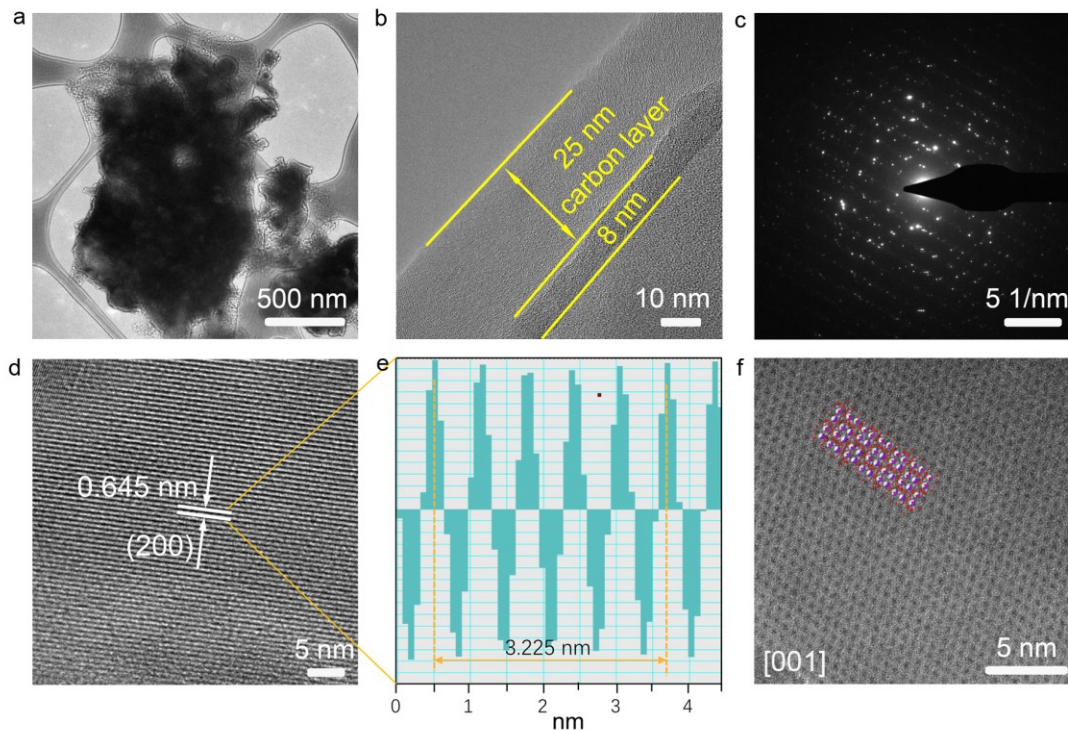

105  
106  
107  
108

Fig. S10. (a, b) TEM images, (c) SAED pattern, (d, e) HRTEM images, and (f) HAADF-STEM image of KVPF-PVDF.

109  
110  
111  
112  
113  
114  
115  
116  
117  
118  
119

#### Supplementary Note 4:

Two characteristic Raman peaks located at  $1342$  and  $1582\text{ cm}^{-1}$  that are corresponding to the D and G bands of carbon materials are observed for KVPF-PVDF (Fig. 2d), which can be attributed to the surface-coated carbon that is generated upon thermal decomposition of PVDF. However, the D and G bands are not found in the Raman spectrum of KVPF-PTFE, indicating the absence of surface carbon layer. The carbon-sulfur (CS) analyzer (Fig. S11a) also confirms the presence of  $3.12\text{wt}\%$  carbon in KVPF-PVDF, whereas the carbon content is almost zero ( $0.01\text{wt}\%$ ) in KVPF-PTFE. Fig. S11b demonstrates how the carbon content changes proportionally with the quantity of PVDF added, highlighting the correlation between these two parameters. Nevertheless, high carbon content could lead to a decrease of the active material content in the electrode, hence decreasing the energy density and specific capacity of the electrode material.

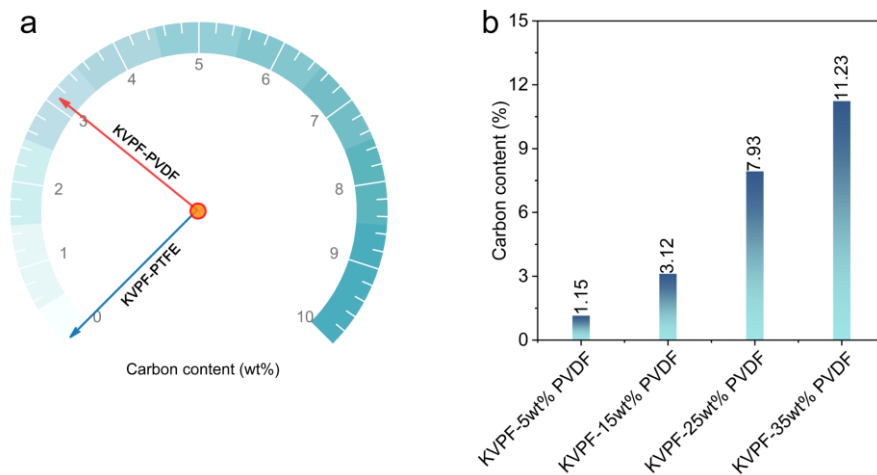

120  
121  
122

**Fig. S11.** (a) Plots of carbon content of KVPF-PVDF and KVPF-PTFE. (b) Plots of carbon content of KVPF with addition of different amount PVDF.

123  
124  
125  
126  
127  
128  
129  
130  
131

### Supplementary Note 5:

The nitrogen adsorption-desorption measurements have been performed to characterize pore structures and obtain specific surface areas of as-prepared samples (Fig. S12). Clearly, all samples prepared with PVDF addition exhibit typical type IV isotherms, indicating their mesoporous structures according to IUPAC classification. The obviously increased specific surface area and mesopore volume with increasing PVDF content has been observed, which is mainly due to the larger decomposition amount of PVDF upon sintering and is consistent with their SEM images, i.e., larger volume change after calcination (as shown in Fig. S3, the samples prepared with increased PVDF content exhibit same mass but obviously larger volume) and obviously smaller tap/bulk density (Fig. S13).

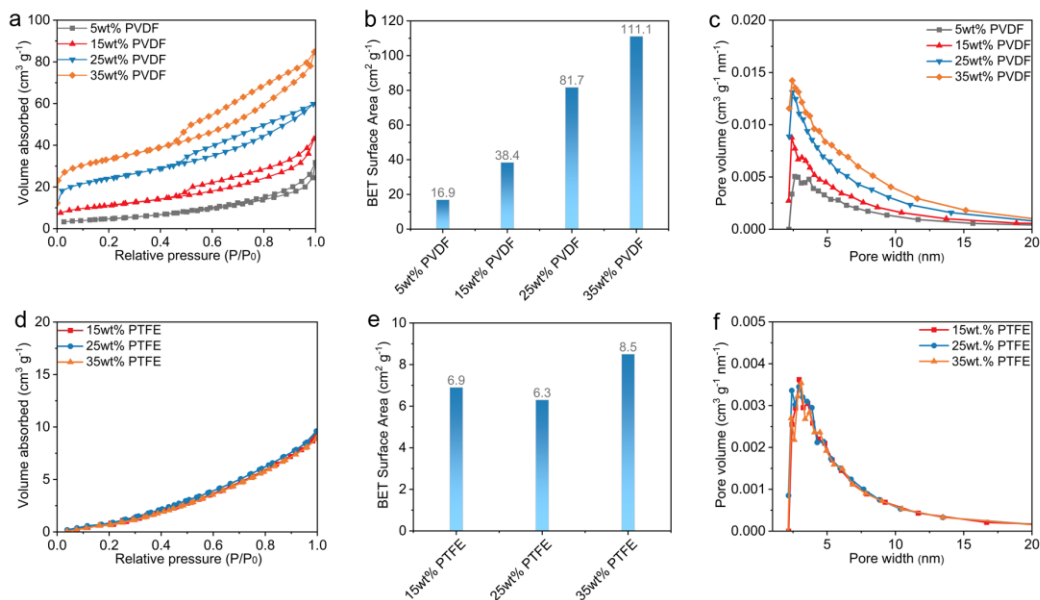

132  
133  
134

**Fig. S12.** (a, d) N<sub>2</sub> adsorption–desorption isotherms, (b, e) BET specific surface area, and (c, f) pore size distributions with different amounts of PVDF/PTFE added.

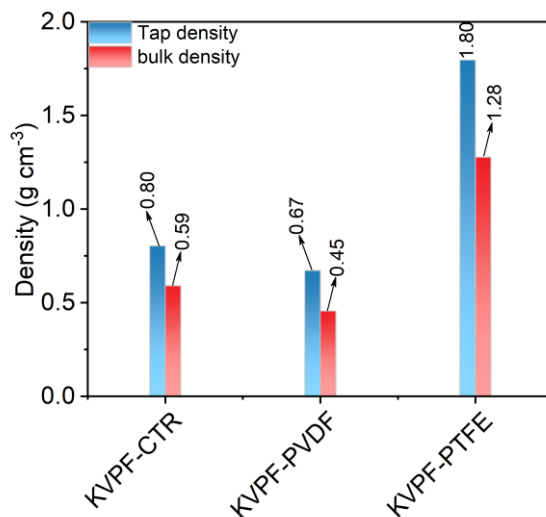

135  
136  
137

**Fig. S13.** The tap density and bulk density of KVPF-PVDF, KVPF-PTFE and KVPF-CTR.



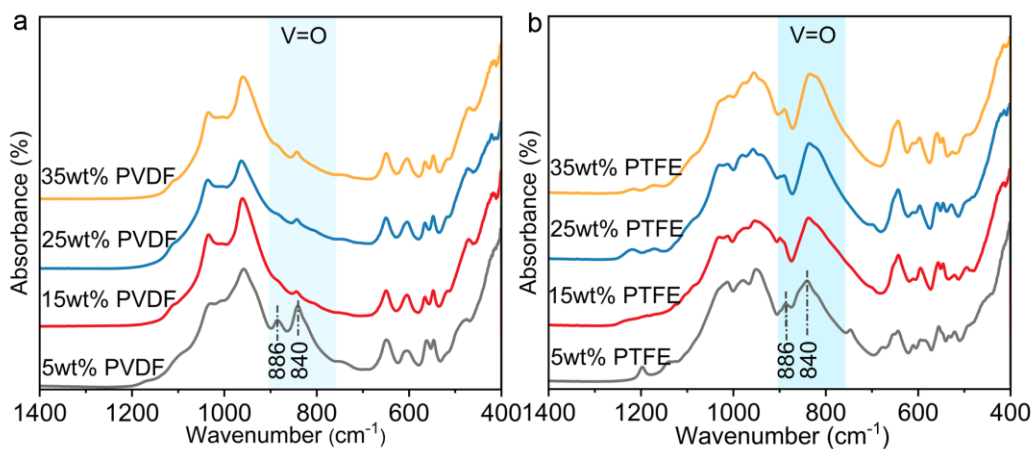

Fig. S14. FTIR patterns of KVPF with addition of different amount (a) PVDF and (b) PTFE.

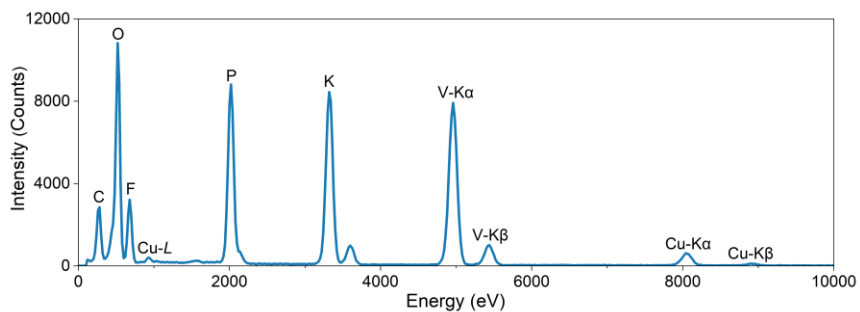

Fig. S15. STEM-EDS spectrum of KVPF-PVDF.

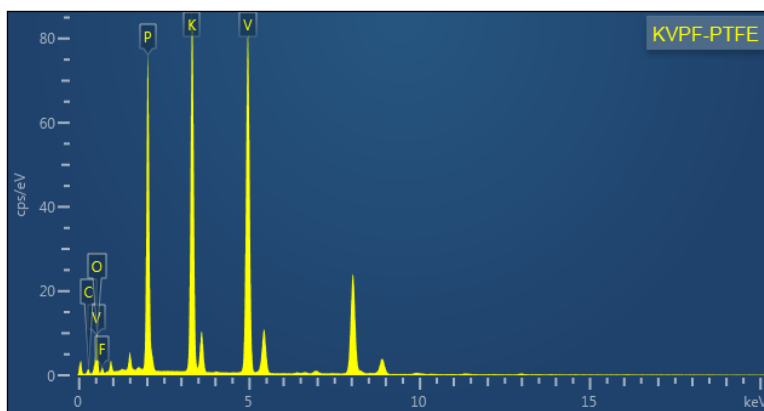

Fig. S16. STEM-EDS spectrum of KVPF-PTFE.

138  
139  
140

141  
142  
143

144  
145

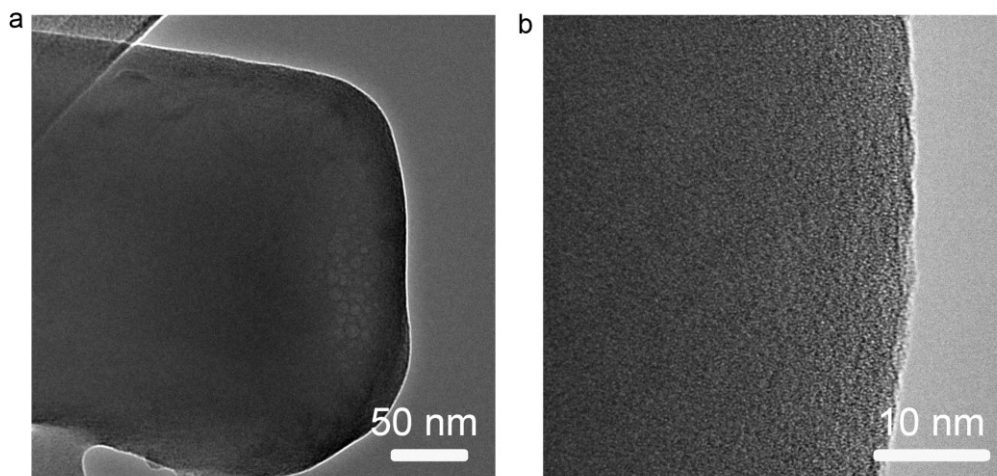

Fig. S17. (a, b) TEM images of KVPF-PTFE.

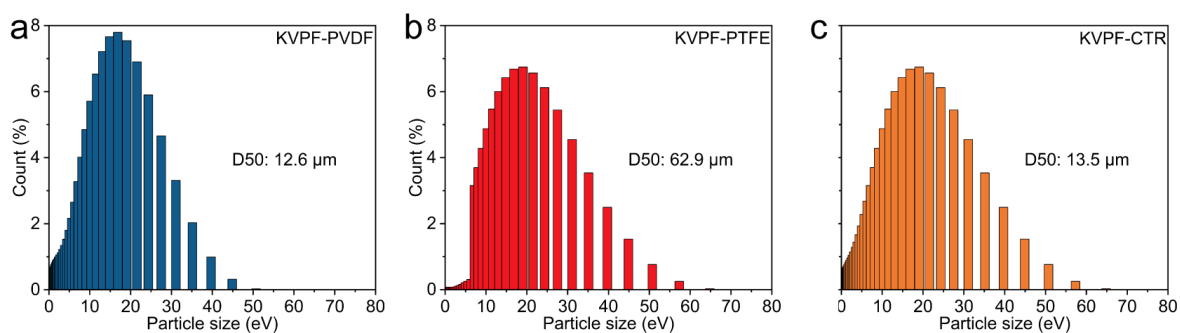

Fig. S18. Particle size distribution curves of (a) KVPF-PVDF, (b) KVPF-PTFE, and (c) KVPF-CTR.

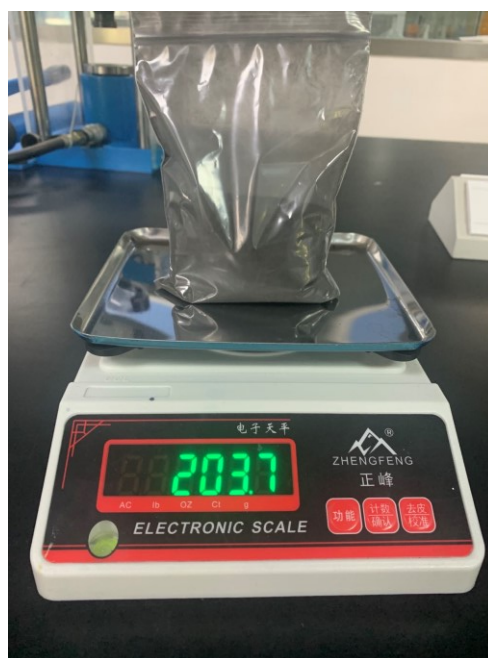

Fig. S19. Digital images of the synthesized 200 g scale KVPF-PVDF products.

146  
147  
148  
149

150  
151  
152

153  
154  
155

156  
157  
158  
159  
160  
161  
162  
163  
164  
165  
166  
167  
168  
169  
170  
171  
172  
173  
174

### Supplementary Note 6:

The crystal growth, morphologies, and phases of the synthesized materials were evaluated through TG-MS, XRD, and SEM analyses. TG-DSC curve for KVPF-PVDF/KVPF-PTFE precursors exhibits three distinct regions (**Fig. S20**). The initial endothermic peak (Peak A,  $\sim 189^\circ\text{C}$ ) is linked to  $\text{NH}_4\text{H}_2\text{PO}_4$  decomposition, resulting in  $\text{H}_4\text{P}_2\text{O}_7$ ,  $\text{NH}_3$  and  $\text{H}_2\text{O}$  generation, which leading to a weight loss of  $\sim 12.1\%$  for KVPF-PVDF and  $\sim 11.6\%$  for KVPF-PTFE due to the release of gaseous substances (**Eq. S1/Eq. S5**, Page 16). In this stage (Stage I), KVPF-PVDF/KVPF-PTFE precursors transform from compact particles to lose porous structures (**Fig. S22** and **Fig. S24**). Further increasing the calcination temperature results in two additional weight losses, indicating the decomposition of PVDF/PTFE and forming the final KVPF-PVDF/KVPF-PTFE products. During this stage (Stage II), the XRD and SEM of two KVPF-PVDF/KVPF-PTFE precursors exhibit distinct responses to temperature, suggesting two different reaction pathways. For KVPF-PVDF precursors, the material becomes more porous with rising temperature, eventually forming a honeycomb structure at  $750^\circ\text{C}$  (**Fig. S22**). In contrast, KVPF-PTFE precursors gradually changed from a loose and porous structure to a dense structure, and finally to large-sized particles with a smooth surface (**Fig. S24**). Notably, upon increasing the temperature to  $850^\circ\text{C}$ , impurity peaks of  $\text{K}_3\text{Fe}_3(\text{PO}_4)_4 \cdot \text{H}_2\text{O}$ -type  $\text{K}_3\text{V}_3(\text{PO}_4)_4$  begin to emerge due to fluorine volatilization. At  $950^\circ\text{C}$ , the  $\text{KVPO}_4\text{F}$  is completely decomposed into  $\text{K}_3\text{Fe}_3(\text{PO}_4)_4 \cdot \text{H}_2\text{O}$ -type  $\text{K}_3\text{V}_3(\text{PO}_4)_4$ , highlighting the thermal stability of the material and the importance of controlling the calcination temperature to control the phase. This phenomenon is also reflected by changes of the material morphology (from a honeycomb structure to a dense structure, **Fig. S22**).

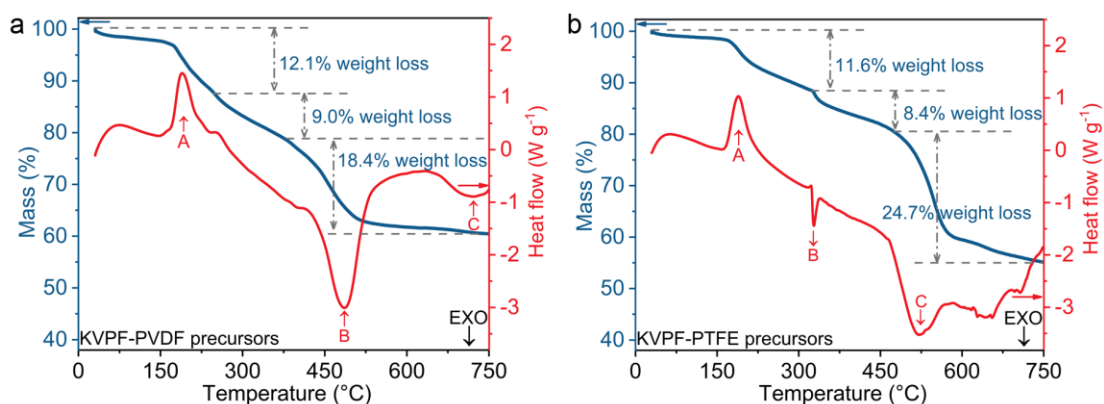

175  
176

**Fig. S20.** TG/DSC curves of the (a) KVPF-PVDF and (b) KVPF-PTFE precursors.

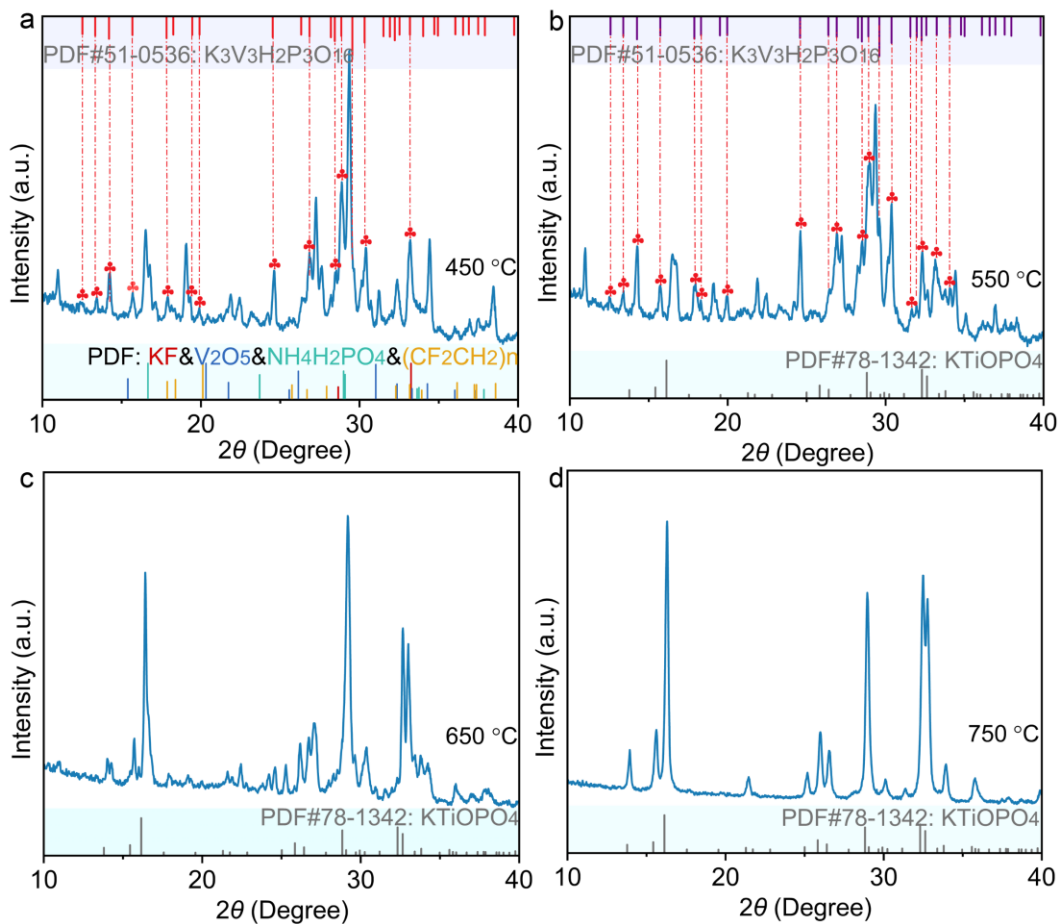

**Fig. S21.** XRD pattern of KVPF-PVDF precursors with different calcination temperatures of (a) 450 °C, (b) 550 °C, (c) 650 °C and (d) 750 °C.

177  
178  
179

# KVPF-PVDF

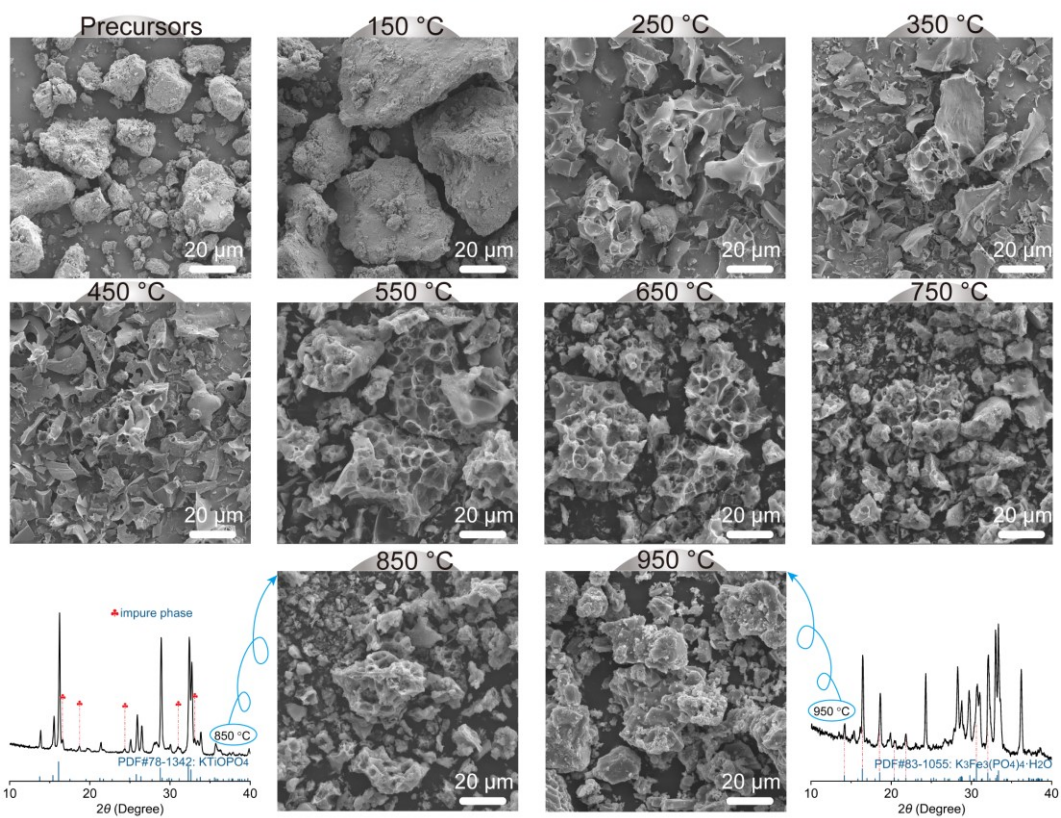

Fig. S22. SEM patterns at different calcination temperatures of KVPF-PVDF.

180  
181



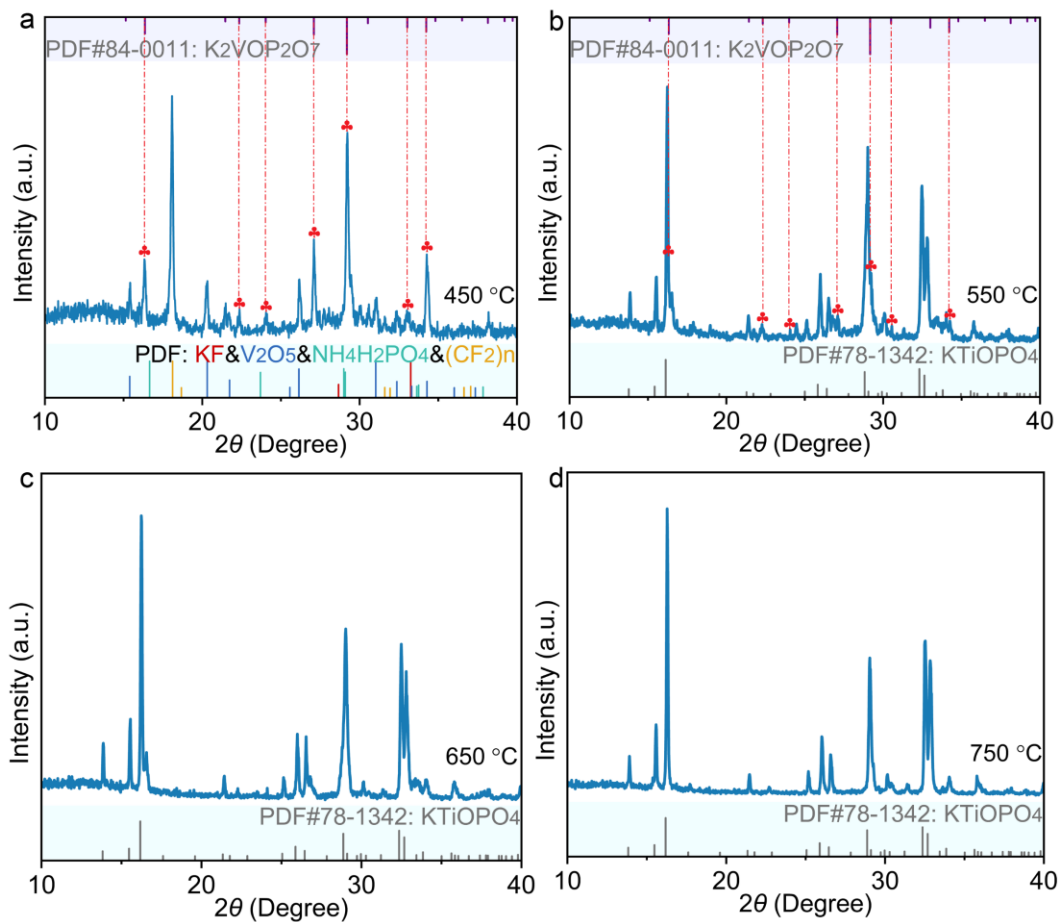

**Fig. S23.** XRD pattern of KVPF-PTFE precursors with different calcination temperatures of (a) 450 °C, (b) 550 °C, (c) 650 °C and (d) 750 °C.

### KVPF-PTFE

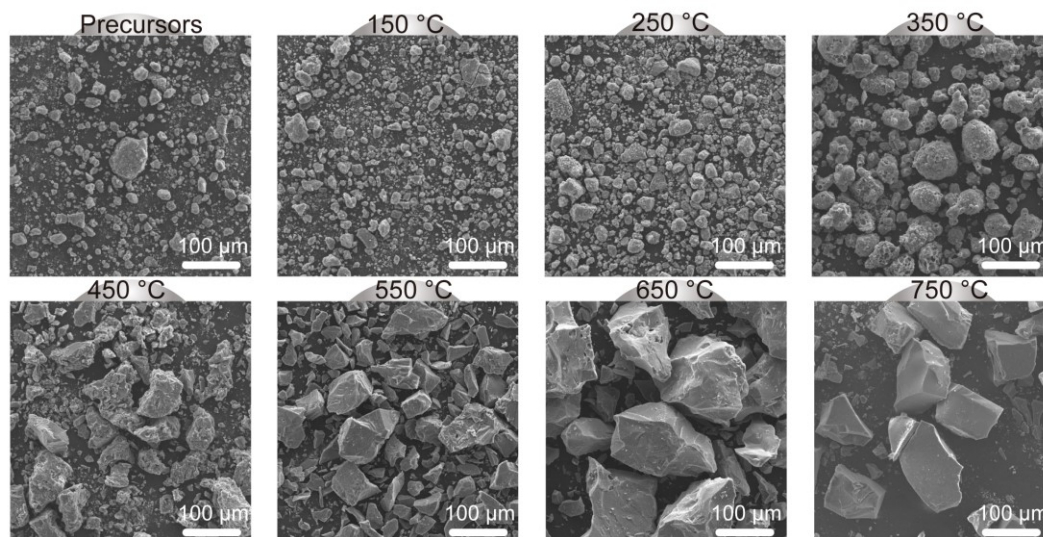

**Fig. S24.** SEM patterns at different calcination temperatures of KVPF-PTFE.

182  
183  
184

185  
186  
187

188 A schematic mechanism of structural and compositional evolution in the synthesis process can be described  
 189 as follows:

190 For KVPF-PVDF:

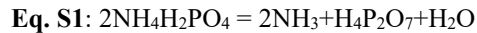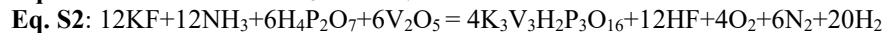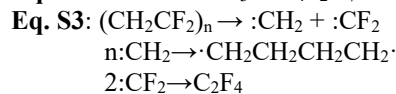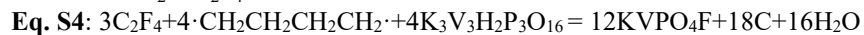

197  
 198 For KVPF-PTFE:

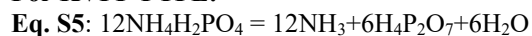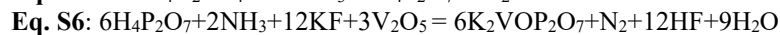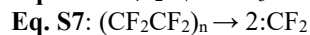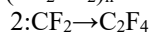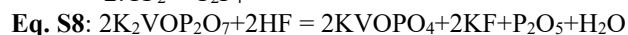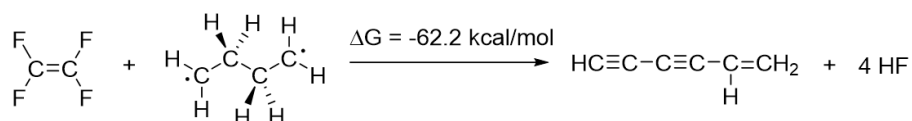

Fig. S25. Computed free energy profiles (in kcal/mol) at the B3LYP+D3(BJ)/6-311+G(2d,p)//B3LYP+D3(BJ)/6-31G\*\* level of theory.

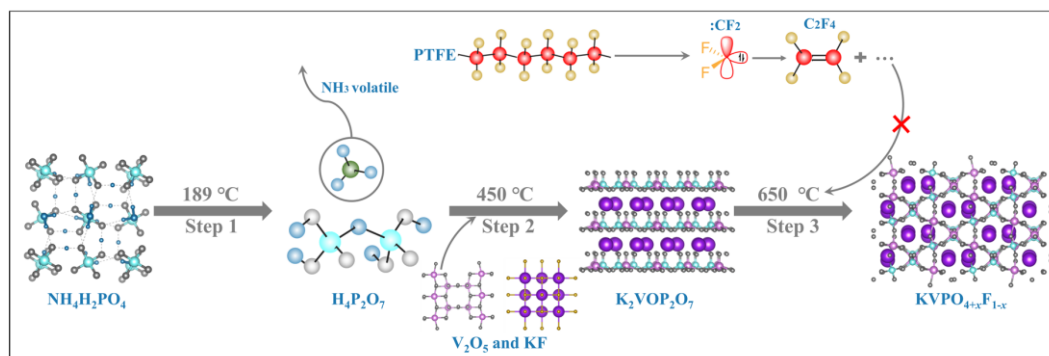

Fig. S26. Mechanism for the synthesis of KVPF-PTFE.

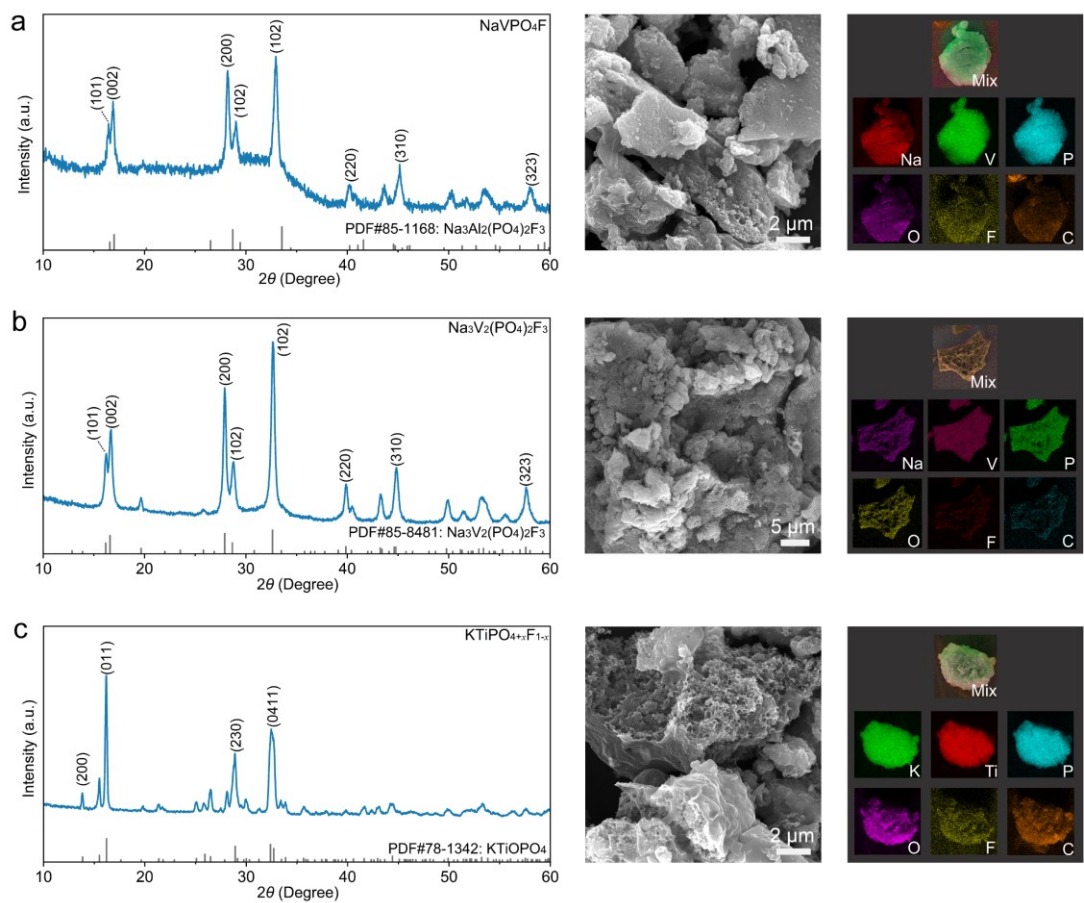

**Fig. S27.** The preparation of other phase-pure  $A_xM_y[(XO_m)_n]_zF_a$ . Characterizations of (a)  $\text{NaVPO}_4\text{F}$ , (b)  $\text{Na}_3\text{V}_2(\text{PO}_4)_2\text{F}_3$  and (c)  $\text{KTiPO}_{4+x}\text{F}_{1-x}$ .

213  
214  
215  
216  
217

218  
219  
220  
221  
222  
223  
224  
225  
226  
227  
228

### Supplementary Note 7:

It should be noted that  $\text{Ti}^{4+}$  cannot be completely reduced to  $\text{Ti}^{3+}$  by carbon at only  $750^\circ\text{C}$  (which may have mixed  $\text{Ti}^{3+}$  and  $\text{Ti}^{4+}$  in  $\text{KTiPO}_{4+x}\text{F}_{1-x}$ ). To support this point, we have conducted supplementary experiments using ion-selective electrode (ISE) method to determine the F content and STEM-EELS to confirm the valence of Ti. Based on the ISE test, the fluorine content of the  $\text{KTiPO}_{4+x}\text{F}_{1-x}$  sample was found to be 22%, so the empirical formula for  $\text{KTiPO}_{4+x}\text{F}_{1-x}$  should be  $\text{KTiPO}_{4.78}\text{F}_{0.22}$ . To verify the valence state of Ti in  $\text{KTiPO}_{4.78}\text{F}_{0.22}$ , we obtained STEM-EELS profiles of  $\text{TiO}_2$ ,  $\text{Ti}_2\text{O}_3$ , and  $\text{KTiPO}_{4.78}\text{F}_{0.22}$  (Fig. S28). In general, the formation of the orbital order results from the band split near the Fermi level. As for  $\text{TiO}_2$ , crystal field splits Ti  $3d$  bands to  $e_g$  and  $t_{2g}$  bands, but not in  $\text{Ti}_2\text{O}_3$ . Usually, we can determine the valency of Ti by the splitting of Ti  $L_{2,3}$  edges. Based on the EELS results,  $\text{KTiPO}_{4.78}\text{F}_{0.22}$  exhibits mixed  $\text{Ti}^{3+}$  and  $\text{Ti}^{4+}$ , thus confirms the partial reduction of Ti.

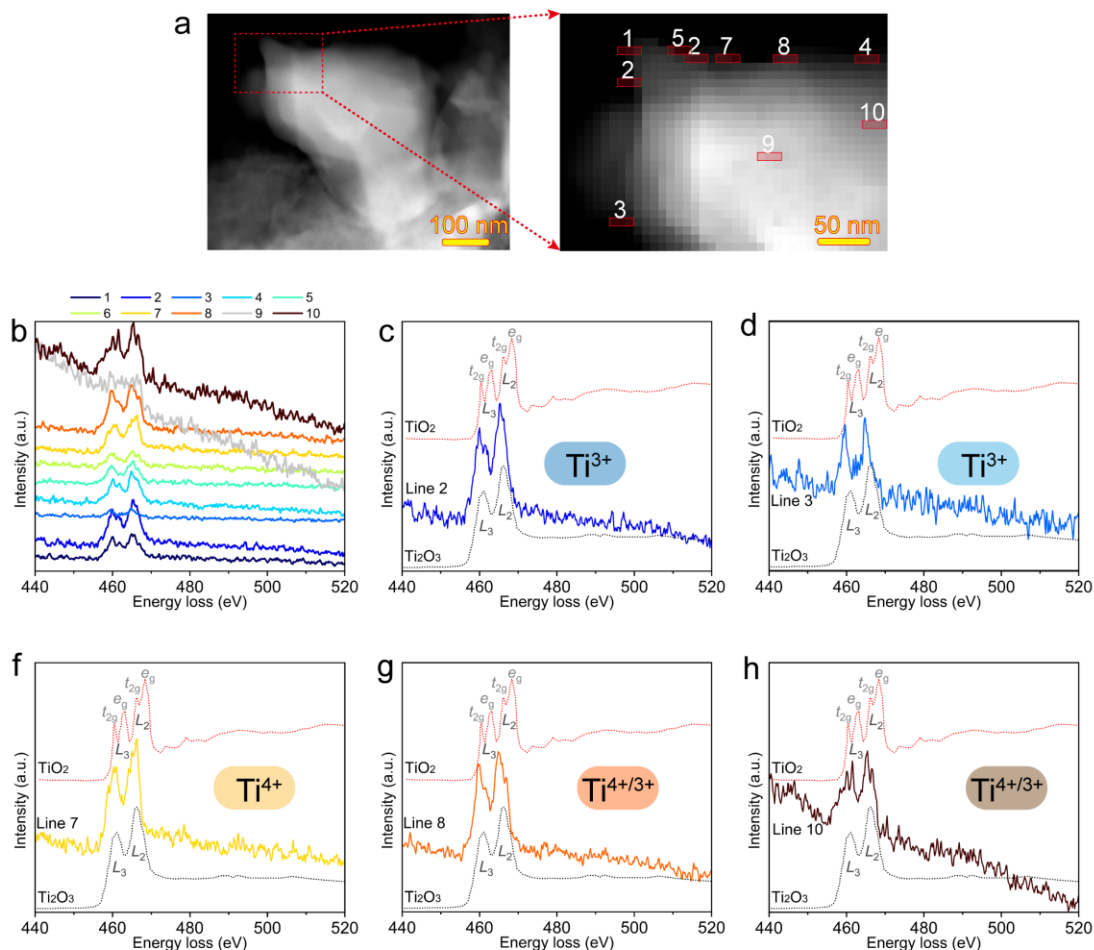

229  
230  
231  
232  
233  
234

**Fig. S28.** (a, b) For statistical significance, analysis is performed at a particle size of  $60 \times 30$  nm. (b-h) The STEM-EELS profiles for Ti  $L_{2,3}$  of  $\text{KVPO}_{4.78}\text{F}_{0.22}$ .

235  
236

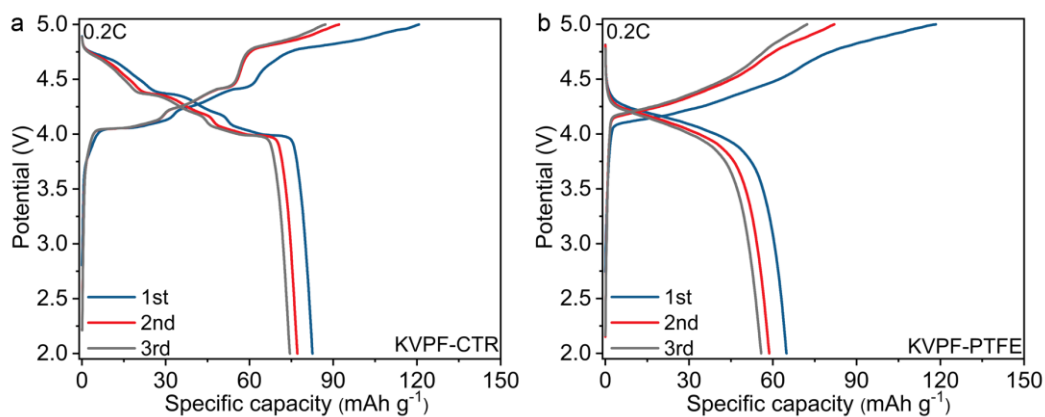

**Fig. S29.** Galvanostatic charging/discharging profiles of (a) KVPF-CTR and (b) KVPF-PTFE at 0.2C.

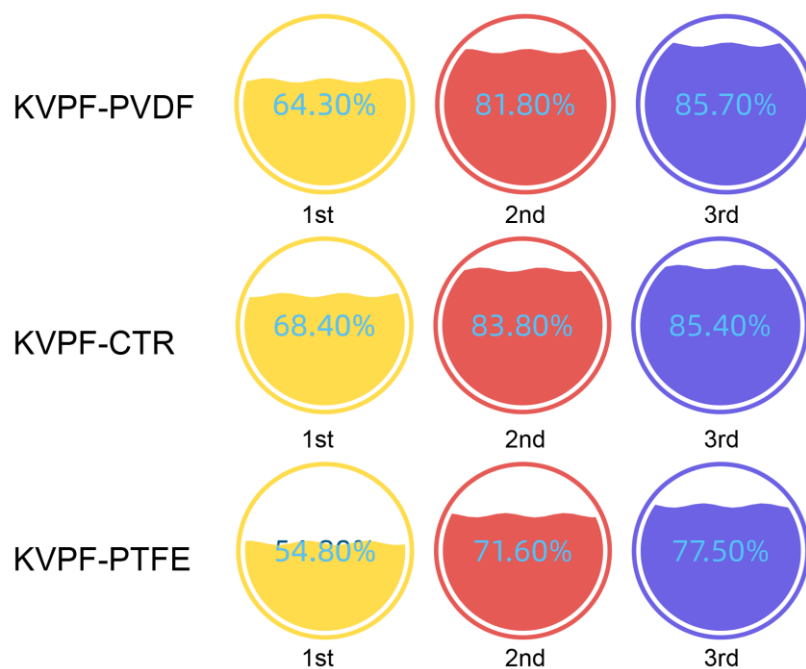

**Fig. S30.** Comparison of the coulombic efficiency of KVPF-PVDF, KVPF-CTR and KVPF-PTFE at 0.2C for initial three cycles.

237  
238  
239  
240



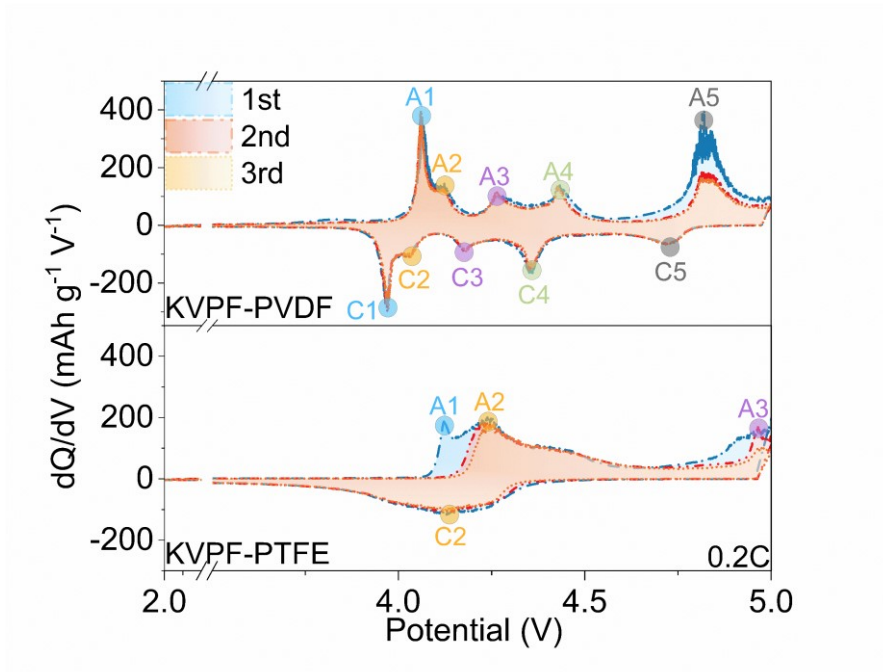

241  
242

**Fig. S31.** dQ/dV plots of KVPF-PVDF and KVPF-PTFE at 0.2C.

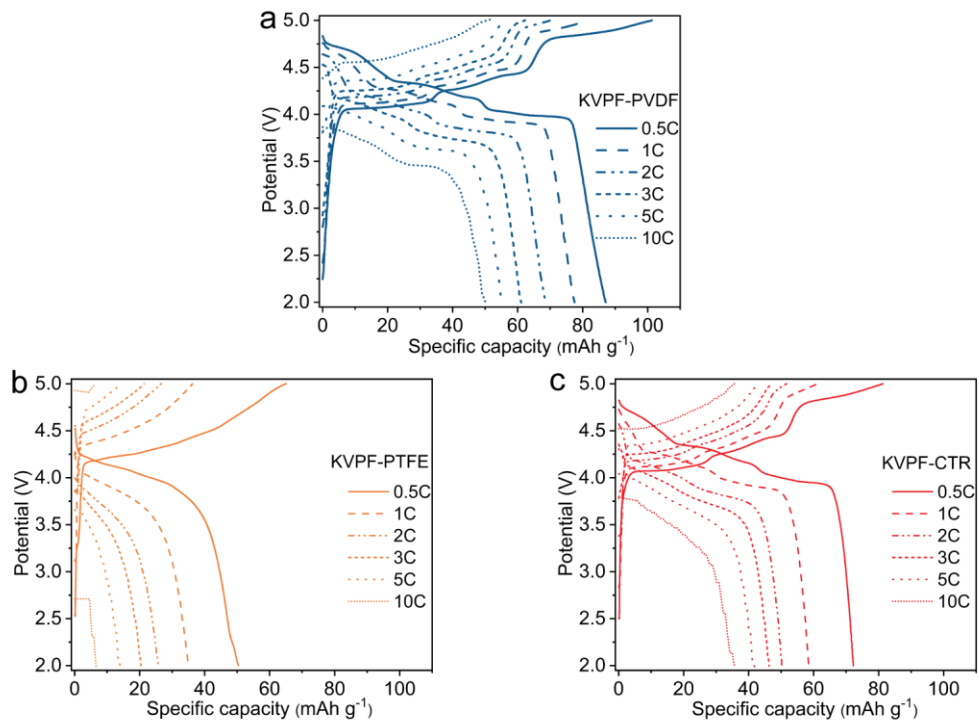

243  
244  
245

**Fig. S32.** Discharging/charging curves of (a) KVPF-PVDF, (b) KVPF-PTFE and (c) KVPF-CTR at different current densities.

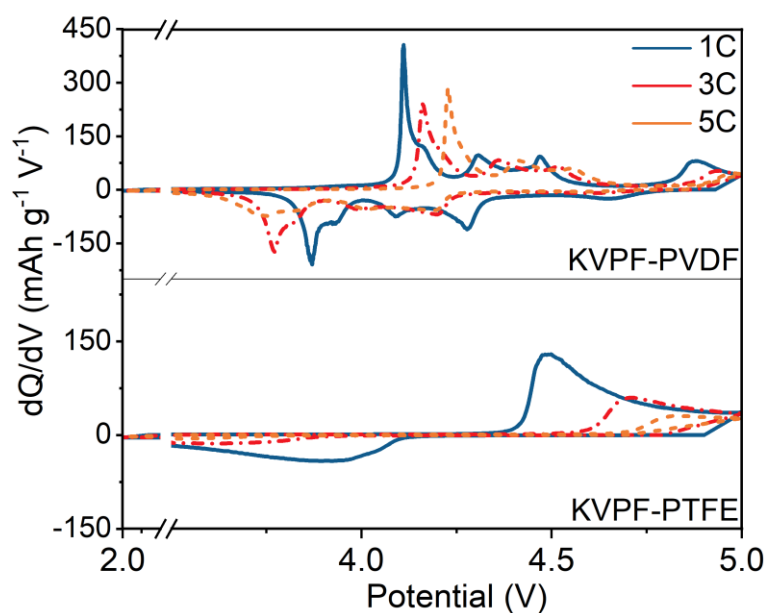

Fig. S33.  $dQ/dV$  plots of KVPF-PVDF and KVPF-PTFE under different current densities.

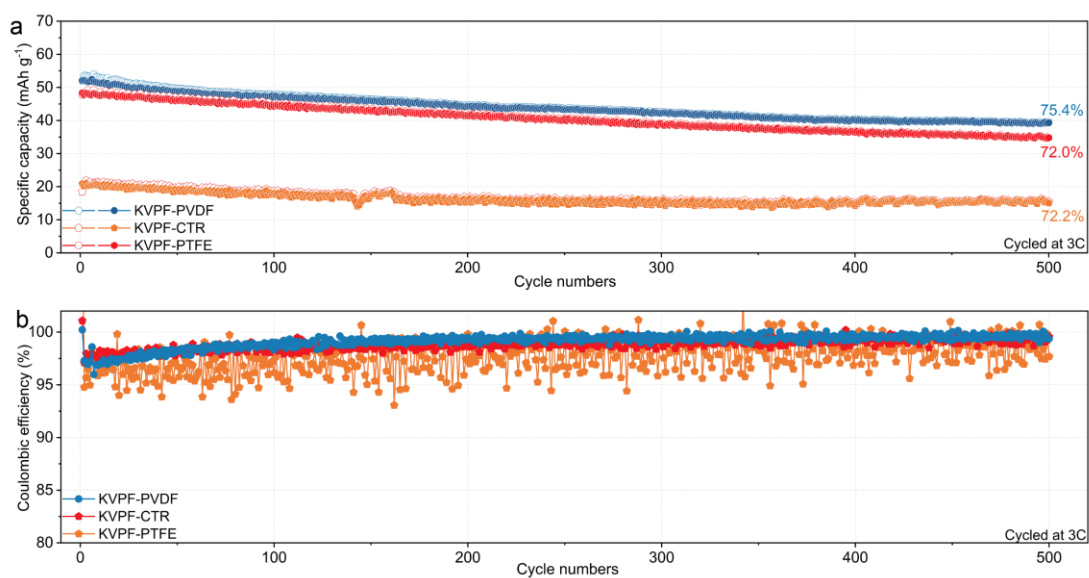

Fig. S34. (a) Cyclability and (b) Coulombic efficiency of KVPF-PVDF, KVPF-CTR and KVPF-PTFE at 3C.

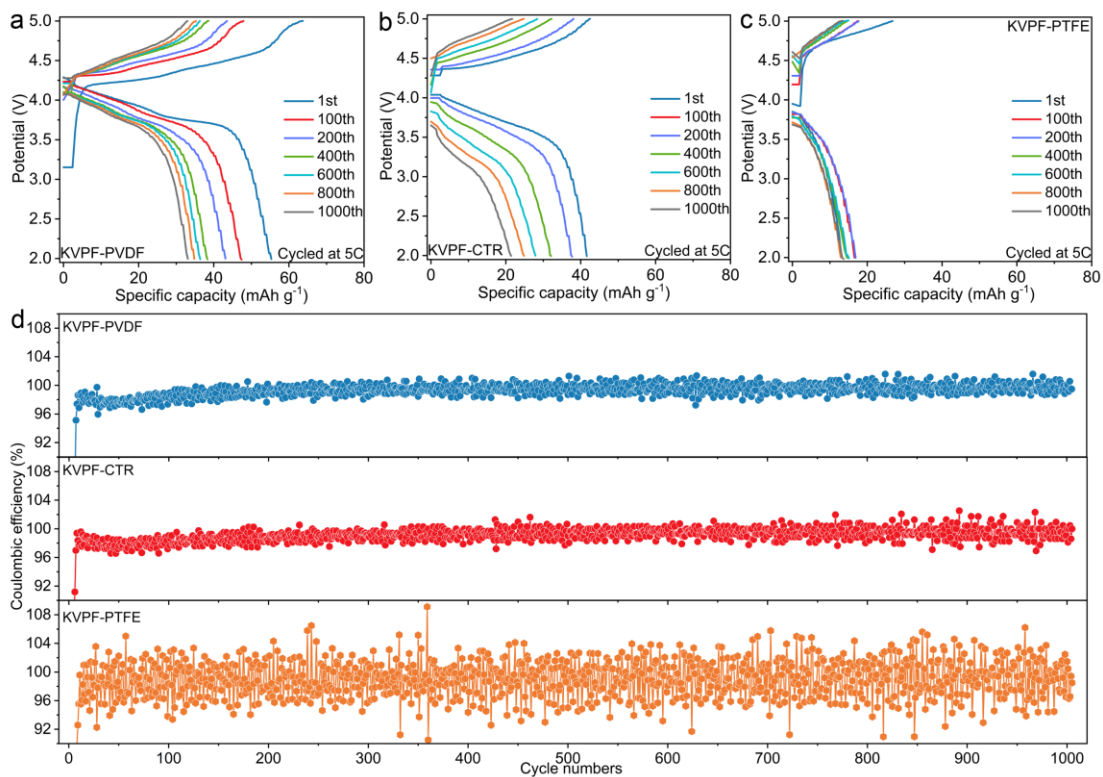

**Fig. S35.** (a, b, c) Cyclability curves and (d) Coulombic efficiency of KVPF-PVDF, KVPF-CTR and KVPF-PTFE at 5C.

251  
252  
253  
254

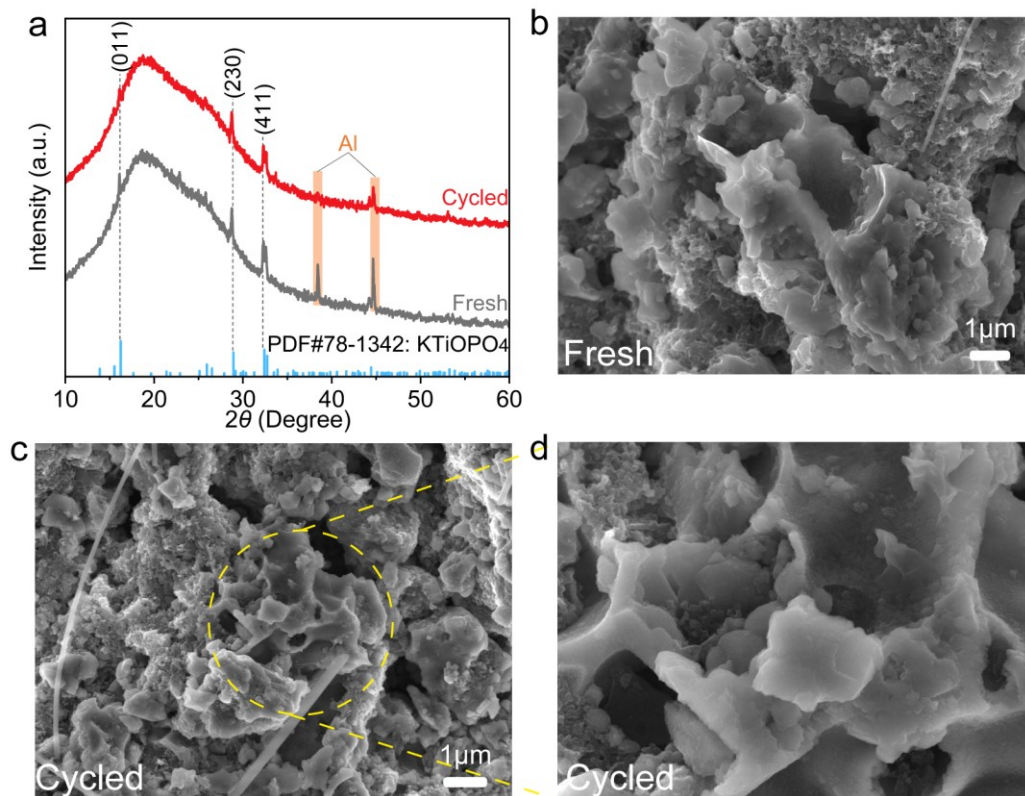

**Fig. S36.** (a) *Ex-situ* XRD and (b, c, d) *Ex-situ* SEM patterns of KVPF-PVDF.

255  
256

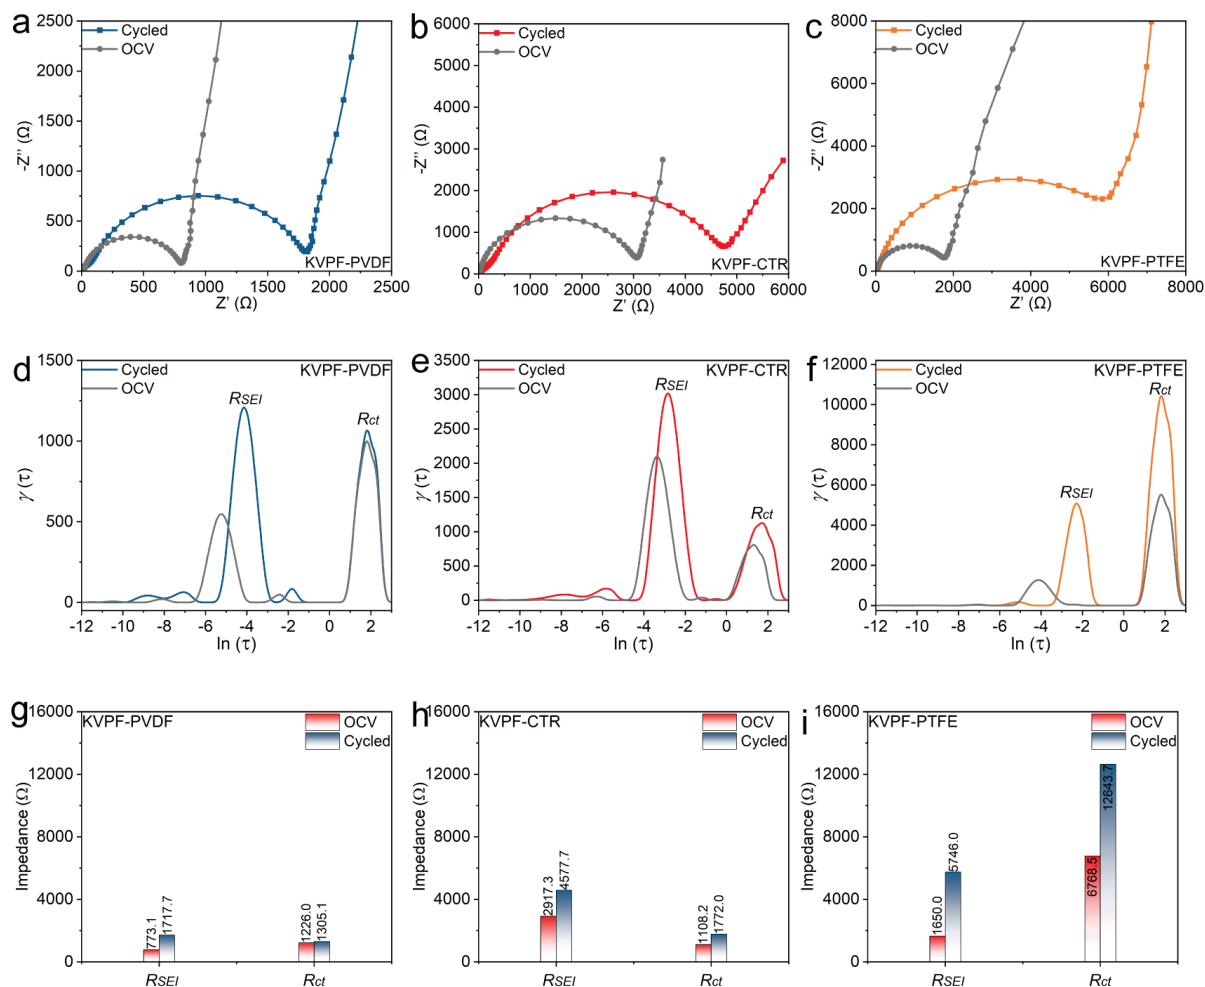

257  
 258 **Fig. S37.** *Ex-situ* EIS Nyquist plots and corresponding DRTs of (a, d, g) KVPF-PVDF, (b, e, h) KVPF-CTR and (c, f,  
 259 i) KVPF-PTFE. As shown in **Fig. S37**, both  $R_{ct}$  and  $R_{SEI}$  of KVPF-PVDF remained relatively stable throughout the  
 260 cycling process, which are obviously lower than both KVPF-CTR and KVPF-PTFE, indicating that the KVPF-PVDF  
 261 cell maintained excellent kinetics even after 1000 cycles.  
 262

263  
264  
265  
266  
267  
268  
269  
270  
271  
272  
273  
274  
275  
276  
277  
278  
279  
280  
281  
282  
283  
284  
285  
286  
287  
288

### Supplementary Note 8:

In case of electrochemical performance, as we all know, the electrochemical performance of electrode materials is influenced by a multitude of factors, including charge-discharge window, carbon content, phase purity, particle size, electrode architecture, porosity and electrolyte, etc.

**Charge-discharge window:** Currently, one of the challenges with  $\text{KVPO}_4\text{F}$  is that it undergoes severe oxidative decomposition when paired with conventional carbonate-based electrolytes at high voltages ( $>4.5\text{V}$ ).<sup>2,4-6</sup> Although narrowing the charge-discharge window could alleviate electrolyte decomposition, it can also result in a significant decrease in reversible capacity at low current density due to inadequate redox reactions of  $\text{V}_{\text{trans}}^{3+} \leftrightarrow \text{V}_{\text{trans}}^{4+}$  in C5/A5, as demonstrated in **Fig. S38a-c**, which is also consistent with the previous findings.<sup>2,4</sup> However, at higher current densities of 5C, the capacity and capacity retention difference between the two charge-discharge windows becomes less noticeable (**Fig. S38d-f**). This is because the large polarization effect leads to unrealized redox reactions (C5/A5) in the high voltage section ( $>4.8\text{V}$ ).

**Porosity and carbon content:** Despite the fact that the specific surface area of the material with 25% PVDF content is about 2.1 times higher than that of the sample with 15% PVDF content (**Fig. S11b**), more carbon was also generated in KVPF-25% PVDF (7.93% carbon content for KVPF-25% PVDF as tested by carbon-sulfur analyzer, **Fig. S11b**) compared to the KVPF-15% PVDF sample. In this case, high carbon content leads to a decrease of the active material content in the electrode, hence decreasing the energy density and specific capacity of the electrode material (**Fig. S39**).

**Phase purity:** The morphology and purity of  $\text{KVPO}_4\text{F}$  are significantly impacted by the calcination temperature, which in turn plays a critical role in determining the electrochemical performance. Hence, controlling the calcination temperature is essential for tailoring the morphology and purity of the material (**Fig. S21** and **S22**), and optimizing its electrochemical performance. The relationship between calcination temperature and electrochemical performance of KVPF-PVDF was showed in **Fig. S40**.

**Mass loading:** It should be noted that increasing the mass loading can have a detrimental effect on the charge transport kinetics, thereby affecting the rate capacity. The relationship between mass loadings of the active materials and electrochemical performance of KVPF-PVDF, KVPF-PTFE, and KVPF-CTR was showed in **Fig. S41-S43**.

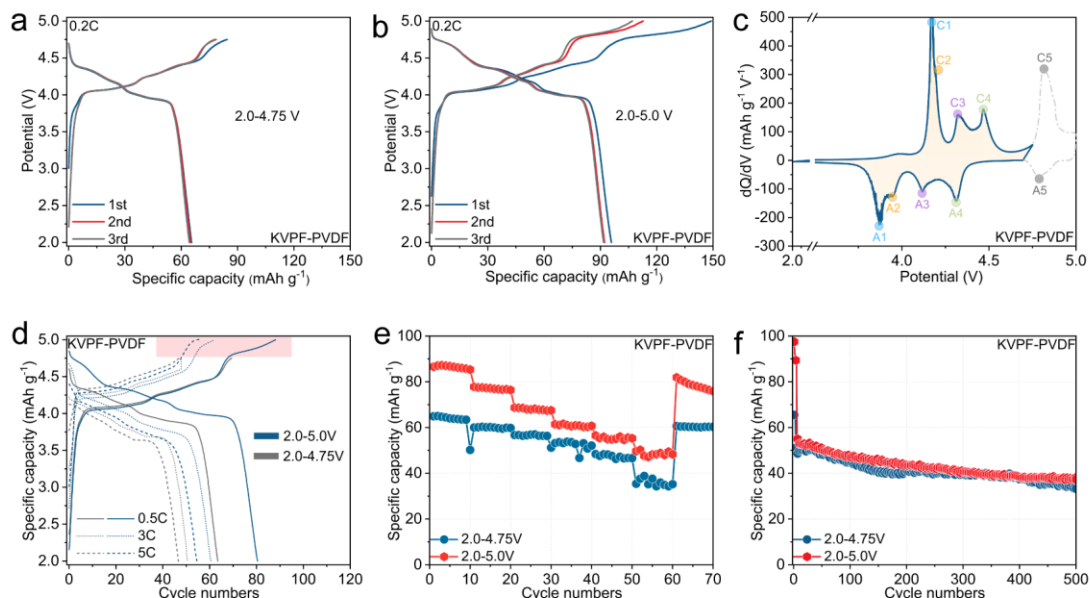

289  
290  
291  
292  
293

**Fig. S38.** Galvanostatic charging/discharging profiles of KVPF-PVDF under different charge-discharge window of (a) 2-4.75 V and (b) 2-5.0 V. (c) dQ/dV plots of KVPF-PVDF under different charge-discharge window. (d, e) Rate capability. (g) Long-term cyclability at 5C.



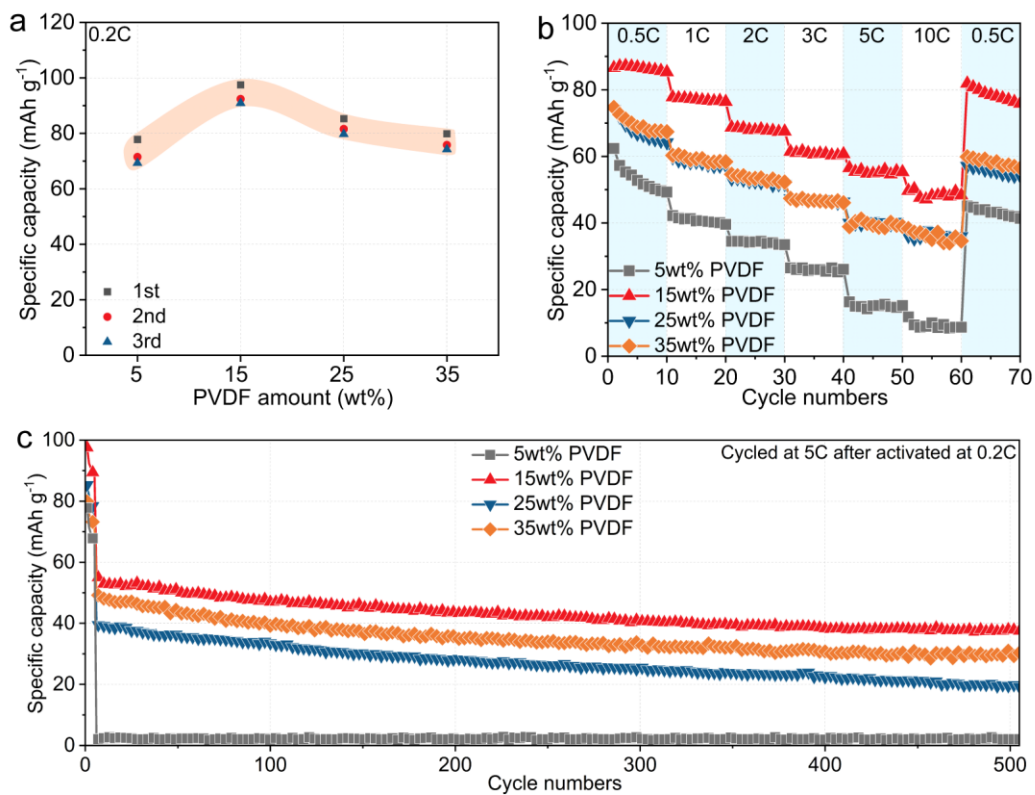

**Fig. S39.** (a) Plots of carbon content of KVPF-15wt% PVDF and KVPF-25wt% PVDF. (b) Galvanostatic charging/discharging profiles of KVPF-25wt% PVDF. (b) Rate capability. (c) Long-term cyclability at 5C.

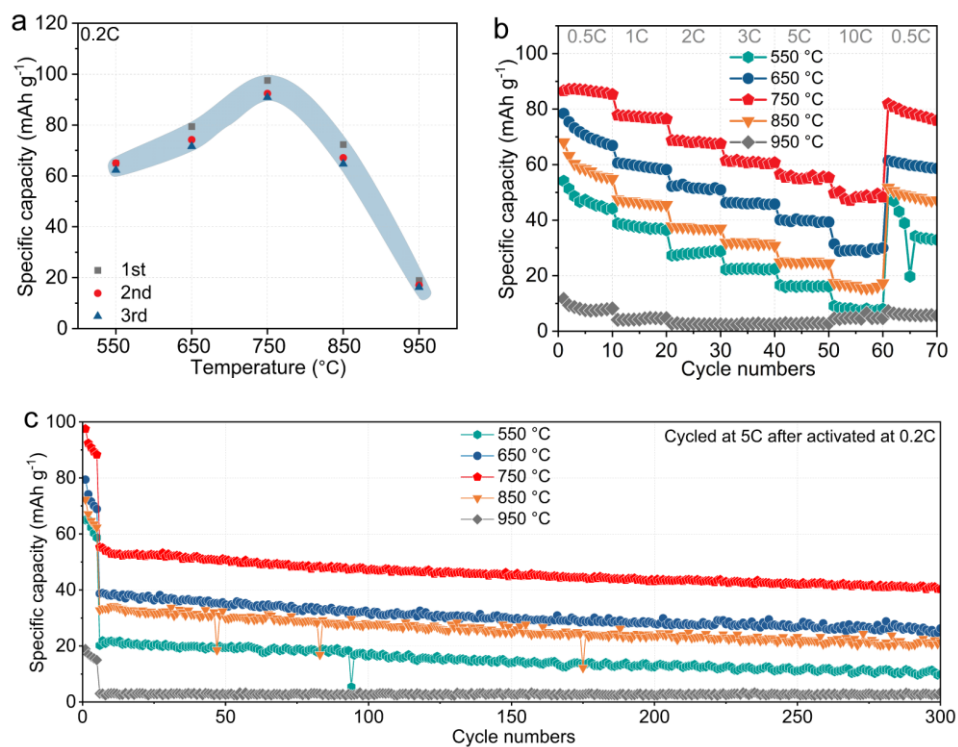

**Fig. S40.** (a) Illustration comparison practical capacities of KVPF-PVDF at different calcination temperatures. (b) Rate capability. (c) Long-term cyclability at 5C.

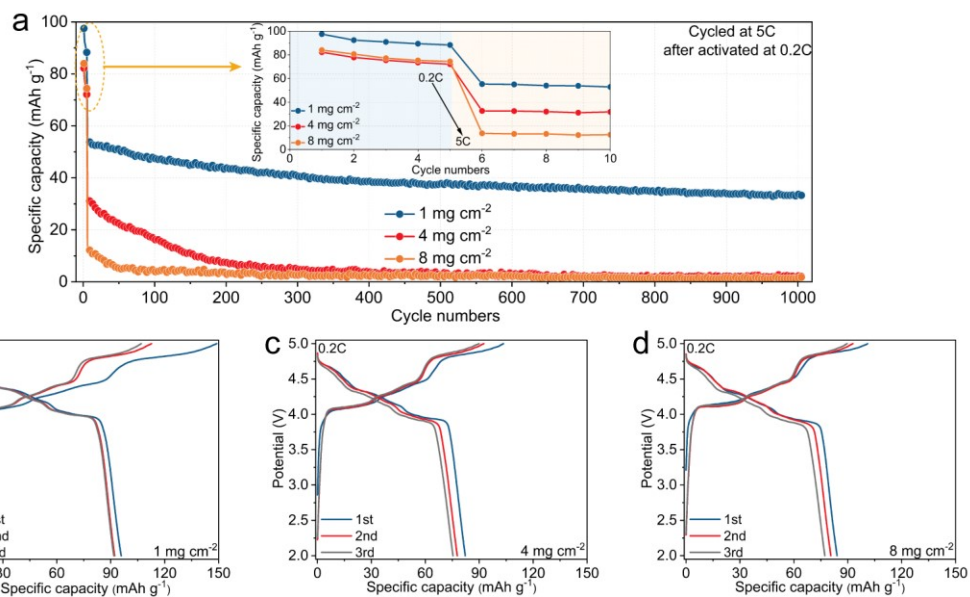

301  
 302 **Fig. S41.** (a) Long-term cyclability of KVPF-PVDF with different loading. (b, c, d) Galvanostatic  
 303 charging/discharging profiles of KVPF-PVDF at 0.2C with different loading.  
 304

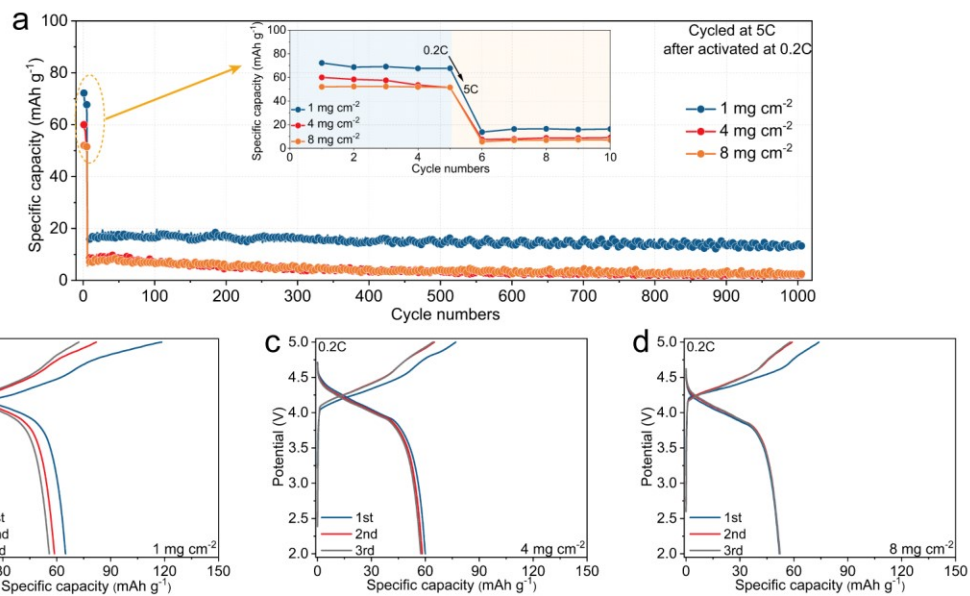

305  
 306 **Fig. S42.** (a) Long-term cyclability of KVPF-PTFE with different loading. (b, c, d) Galvanostatic  
 307 charging/discharging profiles of KVPF-PTFE at 0.2C with different loading.

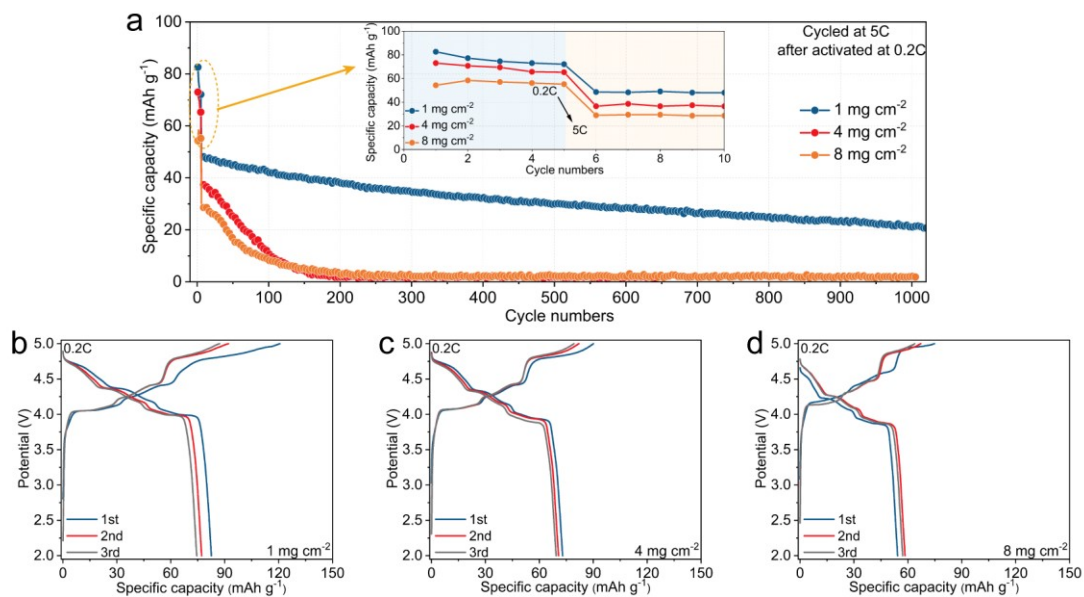

308

309 **Fig. S43.** (a) Long-term cyclability of KVPF-CTR with different loading. (b, c, d) Galvanostatic charging/discharging  
 310 profiles of KVPF-CTR at 0.2C with different loading.

311

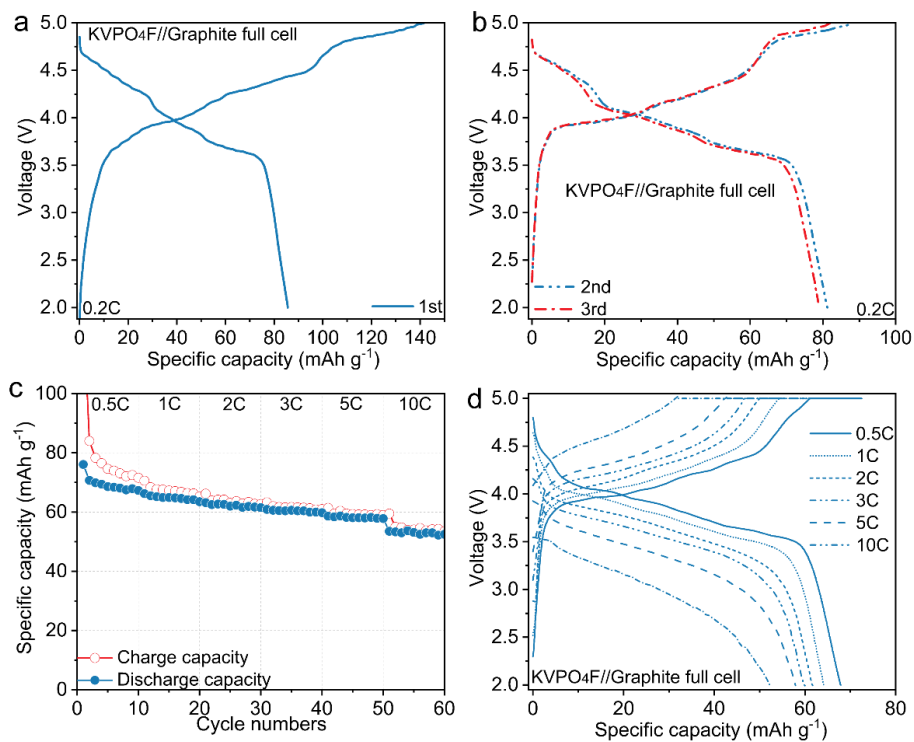

312

313 **Fig. S44.** (a, b) Galvanostatic charge-discharge curves at 0.2C and (c, d) Rate capability of KVPF-PVDF//graphite  
 314 full-cell. For the KVPF-PVDF//graphite coin full-cell, the cathode/anode area is 1.54 cm<sup>2</sup>, the cathode active material  
 315 loading mass is 3.0 mg, the anode active material loading mass is 1 mg, the negative-to-positive (N/P) ratio is 1.1, and  
 316 the nominal capacity is 0.25 mAh.

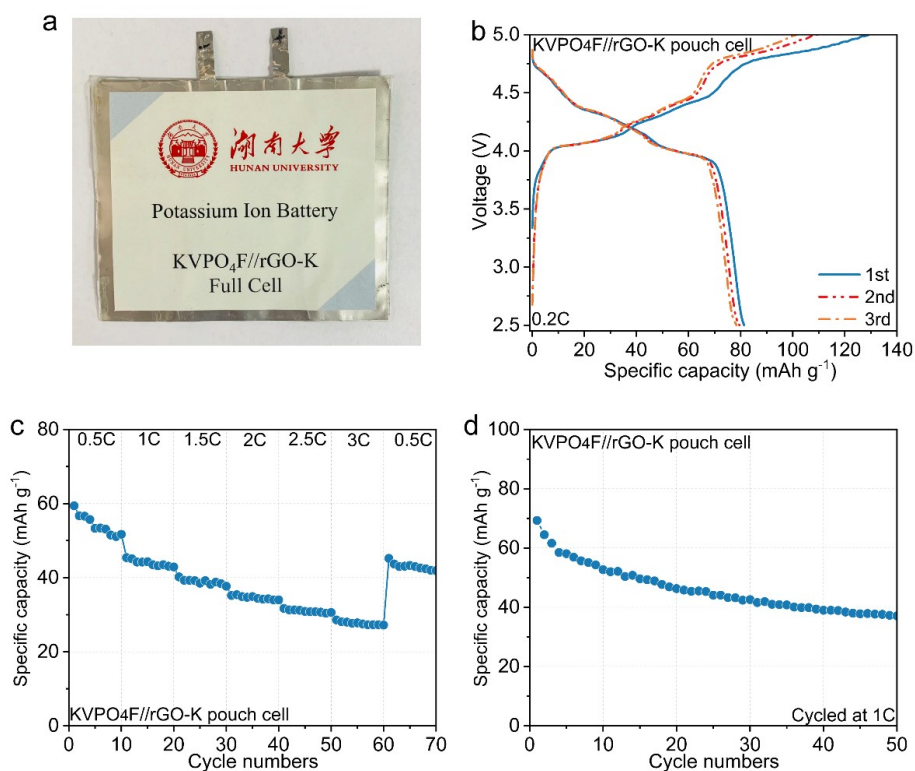

317

318 **Fig. S45.** (a) Digital pictures of the KVPO<sub>4</sub>F//rGO-K pouch cell. (b) Charging/discharging curves of KVPO<sub>4</sub>F//rGO-  
 319 K pouch cell. (c) Rate capability and (d) cycle performance at 1C of KVPO<sub>4</sub>F//rGO-K pouch cell. The pouch  
 320 KVPO<sub>4</sub>F//rGO-K full-cells were assembled by pairing our KVPF-PVDF cathodes with rGO-modified metallic  
 321 potassium anodes.<sup>7</sup> For the KVPO<sub>4</sub>F//rGO-K pouch cell, the cathode/anode area is 20 cm<sup>2</sup>, the cathode active material  
 322 loading mass is 14 mg, the anode active material is 50 μm thick rGO-modified metallic potassium (theoretical areal  
 323 capacity of rGO-K anode is about 2.95 mAh cm<sup>-2</sup>), the negative-to-positive (N/P) ratio is ~44, and the nominal  
 324 capacity is 1 mAh.

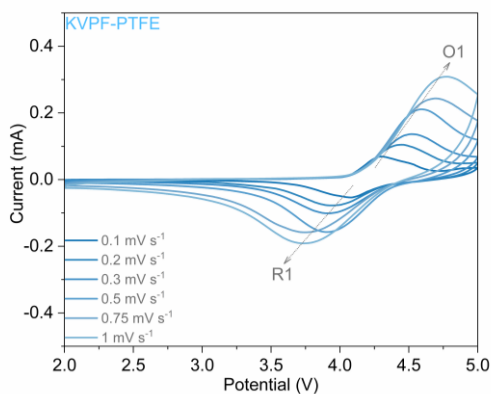

325  
 326  
 327

**Fig. S46.** CV curves of KVPF-PTFE at various scan rates.

328  
329  
330  
331  
332  
333

**Supplementary Note 9:**

The  $K^+$  ion diffusion coefficient ( $D_K$ ) is calculated by using the Randles–Sevcik equation (Eq. S9):<sup>8</sup>

$$I_p = 2.69 \times 10^5 \times n^{\frac{3}{2}} A D_K^{\frac{1}{2}} C v^{\frac{1}{2}} \quad (\text{Eq. 9})$$

where  $I_p$  is the peak current,  $n$  is the number of transferred electrons,  $A$  is the surface area of the electrode,  $C$  is the  $K$ -ion concentration inside the electrode, and  $v$  is the scan rate. As displayed in Fig. S47c-f, the peak current exhibits a good linear relationship with  $v^{\frac{1}{2}}$  for all redox couple peaks.

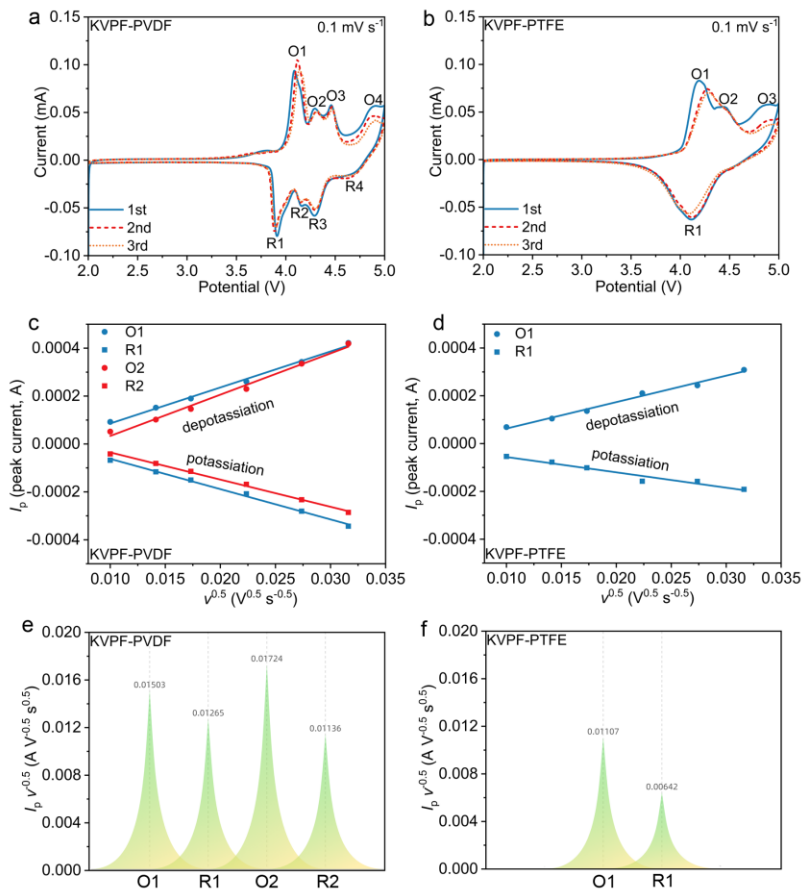

334  
335  
336  
337  
338  
339

**Fig. S47.** (a, b) CV measurements of the KVPF-PVDF and KVPF-PTFE electrode at 0.1 mV s<sup>-1</sup>. (c, d) Linear fitting for the peak current ( $I_p$ ) versus the square root of scan rate ( $v^{1/2}$ ) collected from CV profiles. (e, f) The calculated  $I_p v^{1/2}$  values.

340  
341  
342  
343  
344  
345  
346  
347  
348  
349  
350

### Supplementary Note 10:

The accurate determination of  $R_{ct}$  and  $R_{SEI}$  values is important but typically difficult without extra information of the reactions. Introducing a physical model to fit the EIS data is not employed because it may impose subjectivity to the results. Recently, the distribution of relaxation time (DRT) technique has been developed to separate different polarization processes, which is obtained by transforming the EIS data from frequency domain to time domain, thus is considered as a powerful means of displaying immittance data and can accurately distinguish the highly overlapped physical and chemical processes.<sup>9</sup> Fig. S48 shows the typical DRTs results of corresponding impedance curves of KVPF-PVDF, KVPF-CTR and KVPF-PTFE. The X-axis is time constant, and the peak area represents the impedance related process. Therefore, various processes with different time constant can be separated and identified in the DRT diagram.

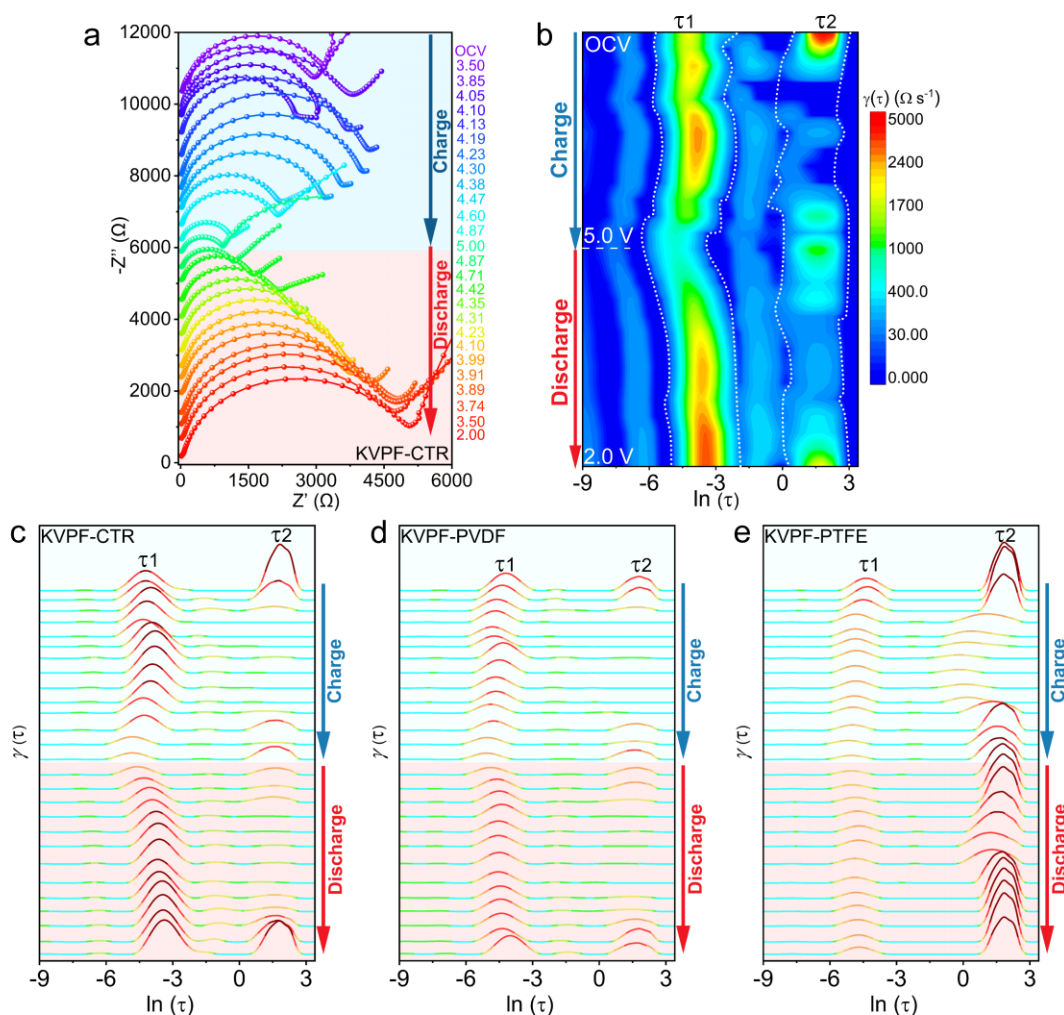

351  
352  
353

**Fig. S48.** (a) *In-situ* EIS Nyquist plots and (b, c) corresponding DRTs of KVPF-CTR. The DRTs plot of (d) KVPF-PVDF and (e) KVPF-PTFE electrode.



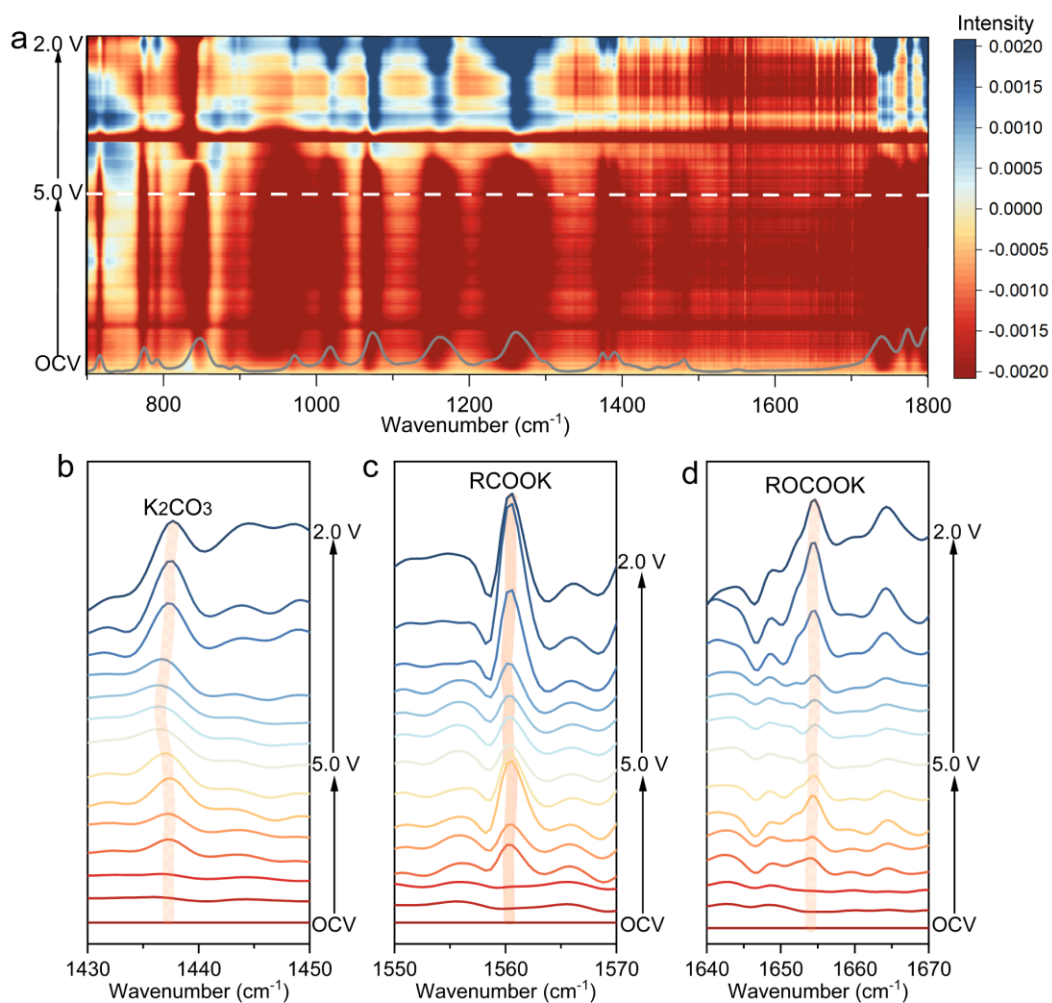

354  
 355 **Fig. S49.** Dynamic evolution of CEI derived from electrolytes on KVPF-PVDF cathode during electrochemical  
 356 operations captured by *in-situ* FTIR.  
 357  
 358  
 359

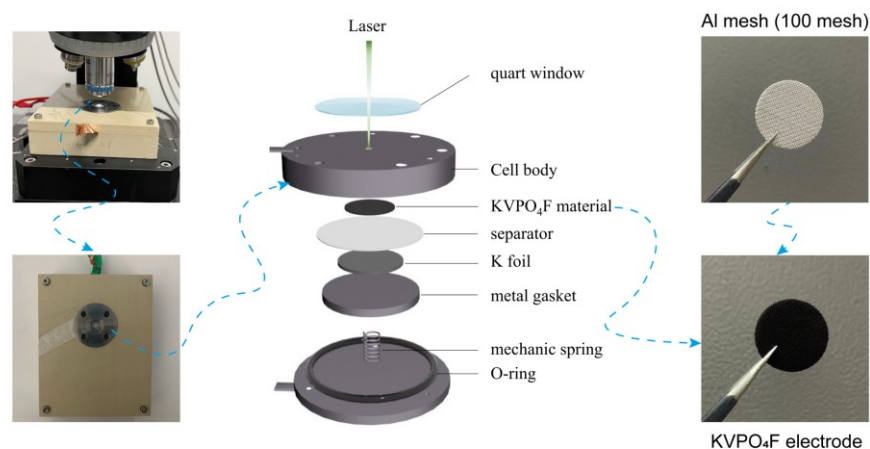

360  
 361 **Fig. S50.** Schematic sketch of *in-situ* Raman cell.  
 362

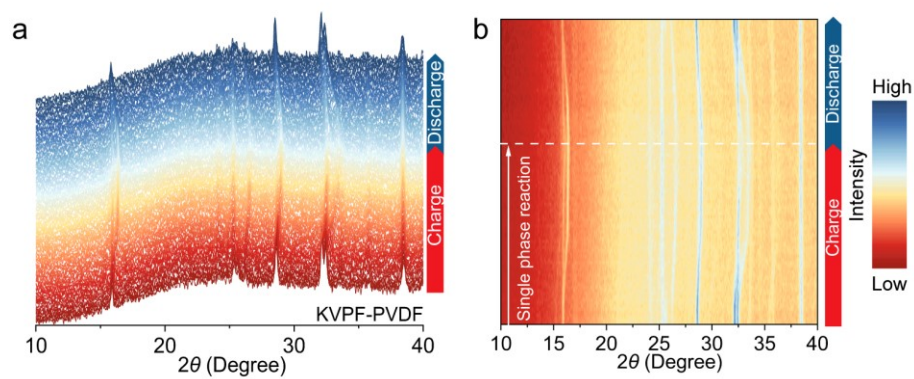

363  
364

**Fig. S51.** *In-situ* XRD patterns of KVPF-PVDF.

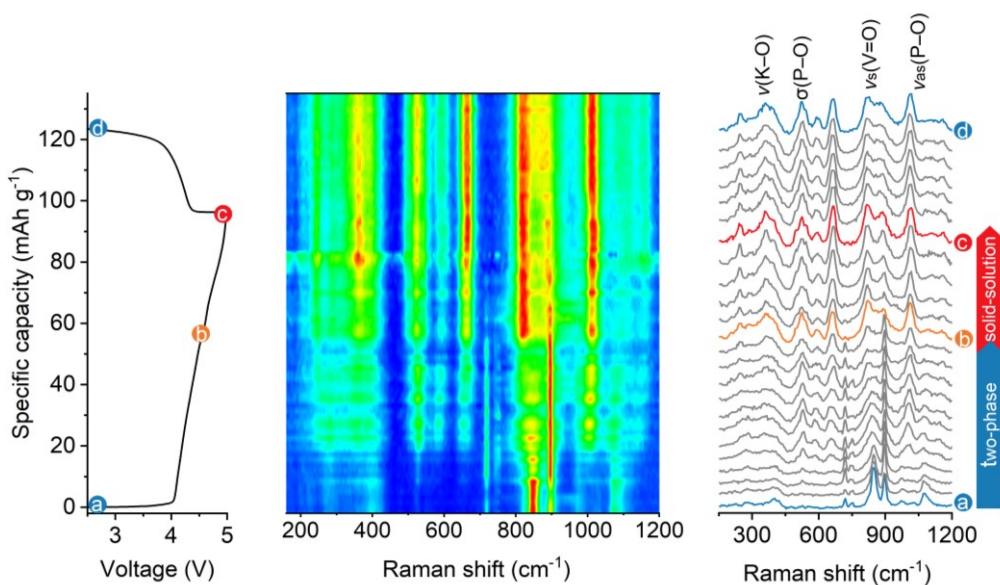

365  
366  
367  
368

**Fig. S52.** The *in-situ* Raman test of KVPF-PTFE.

**Table S1.** Fractional atomic parameters of KVPF-PTFE with  $Pna2_1$  space group.

| Atom   | Occupancy | Site | $x$    | $y$    | $z$     | $U_{iso}$ |
|--------|-----------|------|--------|--------|---------|-----------|
| K1     | 0.5       | 4a   | 0.3879 | 0.7877 | 0.2834  | 0.0158    |
| K1'    | 0.5       | 4a   | 0.3799 | 0.7821 | 0.3304  | 0.0099    |
| K2     | 0.5       | 4a   | 0.1015 | 0.6654 | -0.0149 | 0.0677    |
| K2'    | 0.5       | 4a   | 0.1023 | 0.7166 | 0.0834  | 0.0094    |
| V1     | 1         | 4a   | 0.3834 | 0.4998 | -0.0004 | 0.0316    |
| V2     | 1         | 4a   | 0.2453 | 0.2641 | 0.2499  | 0.0271    |
| P1     | 1         | 4a   | 0.4979 | 0.3147 | 0.2412  | 0.0225    |
| P2     | 1         | 4a   | 0.1798 | 0.4982 | 0.5052  | 0.0226    |
| O1     | 1         | 4a   | 0.4694 | 0.4866 | 0.1293  | 0.0053    |
| O2     | 1         | 4a   | 0.5094 | 0.4676 | 0.3705  | 0.0056    |
| O3     | 1         | 4a   | 0.3929 | 0.2178 | 0.2820  | 0.0043    |
| O4     | 1         | 4a   | 0.5954 | 0.2092 | 0.2339  | 0.0026    |
| O5     | 1         | 4a   | 0.0979 | 0.3361 | 0.5224  | 0.0092    |
| O6     | 1         | 4a   | 0.1180 | 0.6775 | 0.4637  | 0.0015    |
| O7     | 1         | 4a   | 0.2585 | 0.5272 | 0.6339  | 0.0019    |
| O8     | 1         | 4a   | 0.2886 | 0.4779 | 0.4310  | 0.0293    |
| O9/F1  | 1         | 4a   | 0.2883 | 0.5450 | 0.8959  | 0.0104    |
| O10/F2 | 1         | 4a   | 0.2470 | 0.4644 | 0.1190  | 0.0107    |

370

371

**Table S2.** Fractional atomic parameters of KVPF-PVDF with  $Pna2_1$  space group.

| Atom | Occupancy | Site | $x$    | $y$    | $z$    | $U_{iso}$ |
|------|-----------|------|--------|--------|--------|-----------|
| K1   | 0.5       | 4a   | 0.3769 | 0.7666 | 0.2939 | 0.0103    |
| K1'  | 0.5       | 4a   | 0.3977 | 0.7760 | 0.3141 | 0.0103    |
| K2   | 0.5       | 4a   | 0.0998 | 0.6839 | 0.0451 | 0.0103    |
| K2'  | 0.5       | 4a   | 0.1052 | 0.7051 | 0.0895 | 0.0103    |
| V1   | 1         | 4a   | 0.3854 | 0.4952 | 0.0038 | 0.0213    |
| V2   | 1         | 4a   | 0.2514 | 0.2550 | 0.2531 | 0.0118    |
| P1   | 1         | 4a   | 0.5023 | 0.3182 | 0.2423 | 0.0100    |
| P2   | 1         | 4a   | 0.1837 | 0.5104 | 0.5063 | 0.0100    |
| O1   | 1         | 4a   | 0.5008 | 0.4665 | 0.1398 | 0.0100    |
| O2   | 1         | 4a   | 0.5204 | 0.5138 | 0.3618 | 0.0100    |
| O3   | 1         | 4a   | 0.3904 | 0.2114 | 0.2911 | 0.0100    |
| O4   | 1         | 4a   | 0.5734 | 0.1777 | 0.2367 | 0.0100    |
| O5   | 1         | 4a   | 0.1061 | 0.3196 | 0.5411 | 0.0100    |
| O6   | 1         | 4a   | 0.1190 | 0.6776 | 0.4797 | 0.0100    |
| O7   | 1         | 4a   | 0.2645 | 0.5544 | 0.6159 | 0.0100    |
| O8   | 1         | 4a   | 0.2450 | 0.4751 | 0.3741 | 0.0100    |
| F1   | 1         | 4a   | 0.2632 | 0.5316 | 0.8919 | 0.0100    |
| F2   | 1         | 4a   | 0.2690 | 0.5134 | 0.1478 | 0.0100    |

373

374

375

376

377

378

379

380

381  
382

**Table S3.** Selected interatomic distances of KVPF-PTFE and KVPF-PVDF.

| Bond   | Distance for KVPF-PTFE (Å) | Bond   | Distance for KVPF-PVDF (Å) |
|--------|----------------------------|--------|----------------------------|
| V1-O1  | 1.7548                     | V1-O1  | 2.0753                     |
| V1-O2  | 1.9396                     | V1-O2  | 1.9318                     |
| V1-O5  | 2.1689                     | V1-O5  | 2.1166                     |
| V1-O6  | 2.0872                     | V1-O6  | 2.0493                     |
| V1-X1* | 1.6567                     | V1-F1  | 1.9792                     |
| V1-X2* | 2.1597                     | V1-F2  | 2.1384                     |
| V2-O3  | 1.9387                     | V2-O3  | 1.8491                     |
| V2-O4  | 1.9291                     | V2-O4  | 2.3295                     |
| V2-O7  | 1.9412                     | V2-O7  | 1.9511                     |
| V2-O8  | 2.4078                     | V2-O8  | 1.9077                     |
| V2-X1* | 2.1204                     | V2- F1 | 2.0607                     |
| V2-X2* | 1.8779                     | V2- F2 | 2.0085                     |

383

\*X could be O or F.

384

**Table S4.** Comparison of electrochemical performance reported for KVPO<sub>4</sub>F.

| Material                                                                           | Specific capacity (mAh g <sup>-1</sup> ) | Rate capacity (mAh g <sup>-1</sup> ) | Cycling stability                                     | Working voltage (V) | Electrolyte                                | Ref.      |
|------------------------------------------------------------------------------------|------------------------------------------|--------------------------------------|-------------------------------------------------------|---------------------|--------------------------------------------|-----------|
| KVPF-PVDF                                                                          | 95.8 (26.2 mA g <sup>-1</sup> )          | 48.3 (1.31 A g <sup>-1</sup> )       | 64.5% (1000 <sup>th</sup> , 0.655 A g <sup>-1</sup> ) | 4.02                | 0.8M KPF <sub>6</sub> in EC/DEC+1.5wt%TMSP | This work |
| KVPO <sub>4</sub> F <sub>0.5</sub> O <sub>0.5</sub> @C <sub>2</sub> H <sub>2</sub> | 84 (26.2 mA g <sup>-1</sup> )            | 48.1 (1.31 A g <sup>-1</sup> )       | 88% (20 <sup>th</sup> , 0.0262 A g <sup>-1</sup> )    | 4.2                 | 0.8M KPF <sub>6</sub> in EC/DEC            | 10        |
| KVPO <sub>4</sub> F <sub>0.5</sub> O <sub>0.5</sub>                                | 84 (26.2 mA g <sup>-1</sup> )            | Failed (1.31 A g <sup>-1</sup> )     | Not provided                                          | Not provided        |                                            |           |
| KVPF-Al                                                                            | 73.3 (26.2 mA g <sup>-1</sup> )          | 33.6 (1.31 A g <sup>-1</sup> )       | 41.5% (1000 <sup>th</sup> , 0.655 A g <sup>-1</sup> ) | 4.01                | 0.8M KPF <sub>6</sub> in EC/DEC+1.5wt%TMSP | 11        |
| KVPF-film                                                                          | 92.4 (26.2 mA g <sup>-1</sup> )          | 49.0 (1.31 A g <sup>-1</sup> )       | 74.9% (1000 <sup>th</sup> , 0.655 A g <sup>-1</sup> ) | 4.02                |                                            |           |
| KVPO <sub>4</sub> F                                                                | 70 (6.65 mA g <sup>-1</sup> )            | 67.0 (0.655 A g <sup>-1</sup> )      | 97% (30 <sup>th</sup> , 0.0066 A g <sup>-1</sup> )    | 4.0                 | 0.7M KPF <sub>6</sub> in EC/DEC            | 2         |
| KVPO <sub>4</sub> F                                                                | 105 (5 mA g <sup>-1</sup> )              | 44.0 (0.3 A g <sup>-1</sup> )        | 78.3% (10 <sup>th</sup> , 0.02 A g <sup>-1</sup> )    | 4.0                 | 0.7M KPF <sub>6</sub> in EC/DEC            | 4         |
| KVPO <sub>4.36</sub> F <sub>0.64</sub>                                             | 85 (5 mA g <sup>-1</sup> )               | 54.0 (0.3 A g <sup>-1</sup> )        | 91.7% (10 <sup>th</sup> , 0.02 A g <sup>-1</sup> )    | Not provided        |                                            |           |
| KVPF@C-bulk                                                                        | 94.2 (20 mA g <sup>-1</sup> )            | 21.2 (0.655 A g <sup>-1</sup> )      | 88.1% (200 <sup>th</sup> , 0.0655 A g <sup>-1</sup> ) | 4.12                | 1M KPF <sub>6</sub> in PC/EC               | 12        |
| KVPF@C-PMS                                                                         | 101.5 (20 mA g <sup>-1</sup> )           | 70.1 (0.655 A g <sup>-1</sup> )      | 85.1% (200 <sup>th</sup> , 0.0655 A g <sup>-1</sup> ) | 4.02                |                                            |           |
| KVPF                                                                               | 98.6 (20 mA g <sup>-1</sup> )            | Failed (0.5 A g <sup>-1</sup> )      | 71.0% (55 <sup>th</sup> , 0.05 A g <sup>-1</sup> )    | 4.03                | 0.8M KPF <sub>6</sub> in EC/DEC            | 13        |
| KVPF@3DC                                                                           | 103 (20 mA g <sup>-1</sup> )             | 60.2 (0.5 A g <sup>-1</sup> )        | 85.4% (550 <sup>th</sup> , 0.5 A g <sup>-1</sup> )    | 4.03                |                                            |           |
| KVPF@C-bare                                                                        | 95 (20 mA g <sup>-1</sup> )              | 88.8 (0.05 A g <sup>-1</sup> )       | 84.9% (50 <sup>th</sup> , 0.05 A g <sup>-1</sup> )    | 4.03                | 0.8M KPF <sub>6</sub> in EC/DEC            | 5         |
| KVPF@C-MC2                                                                         | 100 (20 mA g <sup>-1</sup> )             | 84.4 (0.05 A g <sup>-1</sup> )       | 100% (50 <sup>th</sup> , 0.05 A g <sup>-1</sup> )     | 4.03                |                                            |           |
| KVPF@C                                                                             | 82.9 (25 mA g <sup>-1</sup> )            | 46.3 (1 A g <sup>-1</sup> )          | Not provided                                          | Not provided        |                                            |           |
| KVPF@K                                                                             | 101.6 (25 mA g <sup>-1</sup> )           | 47.9 (1 A g <sup>-1</sup> )          | 53.2% (100 <sup>th</sup> , 0.2 A g <sup>-1</sup> )    | 3.96                | 1M KPF <sub>6</sub> in PC/EC               | 14        |
| KVPF@KCO-K                                                                         | 142 (25 mA g <sup>-1</sup> )             | 70.6 (1 A g <sup>-1</sup> )          | 74.1% (100 <sup>th</sup> , 0.2 A g <sup>-1</sup> )    | 3.98                |                                            |           |
| KVPF-ball                                                                          | 105 (20 mA g <sup>-1</sup> )             | 59.2 (5 A g <sup>-1</sup> )*         | 65% (100 <sup>th</sup> , 0.02 A g <sup>-1</sup> )     | 4.10                | 0.5M KPF <sub>6</sub> in PC/FEC            | 15        |
| KVPF-platelet                                                                      | 94 (20 mA g <sup>-1</sup> )              | 30.0 (5 A g <sup>-1</sup> )*         | 53% (100 <sup>th</sup> , 0.02 A g <sup>-1</sup> )     | 4.01                |                                            |           |
| KVPF-flower                                                                        | 103 (20 mA g <sup>-1</sup> )             | 87.6 (5 A g <sup>-1</sup> )*         | 80% (900 <sup>th</sup> , 1 A g <sup>-1</sup> )        | 3.97                |                                            |           |
| KVPF-CTR                                                                           | 74.6 (26.2 mA g <sup>-1</sup> )          | 46.2 (2.62 A g <sup>-1</sup> )**     | 80.2% (100 <sup>th</sup> , 0.0655 A g <sup>-1</sup> ) | 4.00                | 1M KPF <sub>6</sub> in PC/EC+5vol%FEC      | 16        |
| KVPF@CMK-3                                                                         | 103.2 (26.2 mA g <sup>-1</sup> )         | 90.1 (2.62 A g <sup>-1</sup> )**     | 88.2% (500 <sup>th</sup> , 1.31 A g <sup>-1</sup> )   | 3.93                |                                            |           |
| KVPF-CTR                                                                           | 94.2 (20 mA g <sup>-1</sup> )            | Failed (10 A g <sup>-1</sup> )***    | 73.5% (100 <sup>th</sup> , 0.05 A g <sup>-1</sup> )   | 3.96                | 1M KPF <sub>6</sub> in PC/EC+5wt%FEC       | 17        |
| KVPF-P3/C                                                                          | 106.5 (20 mA g <sup>-1</sup> )           | 73.8 (10 A g <sup>-1</sup> )***      | 82.5% (1000 <sup>th</sup> , 1 A g <sup>-1</sup> )     | 3.97                |                                            |           |
| KVPF@rGO                                                                           | 103.2 (20 mA g <sup>-1</sup> )           | 88.1 (5 A g <sup>-1</sup> )****      | 76.9% (500 <sup>th</sup> , 1.31 A g <sup>-1</sup> )   | 3.94                | 1M KPF <sub>6</sub> in PC/EC+5vol%FEC      | 18        |
| KVPF                                                                               | 85.0 (20 mA g <sup>-1</sup> )            | 26.8 (5 A g <sup>-1</sup> )****      | 23.3% (500 <sup>th</sup> , 1.31 A g <sup>-1</sup> )   | 3.95                |                                            |           |

386

387

388

389

390

391

392

393

394

395

396

397

398

399

400

**Note:** The test methods for rate performance and cycle stability of some papers are slow charge and fast discharge mode (marked with “\*”) rather than standard constant current charge/discharge mode, no doubt this will be significant improvement in electrochemical performance.

\*The rate performance is 50 mA g<sup>-1</sup> for charge and 5 A g<sup>-1</sup> for discharge (slow charging and fast discharging mode). The cycling stability test with a fixed current density of 0.02A g<sup>-1</sup>.

\*\*The condition of rate performance for KVPF@CMK-3 is 65.5 mA g<sup>-1</sup> for charge and 1.31 A g<sup>-1</sup> for discharge (slow charging and fast discharging mode). The condition of cycling stability is not clear.

\*\*\*The condition of rate performance for KVPF@P3/C is 65.5 mA g<sup>-1</sup> for charge and 1 A g<sup>-1</sup> for discharge (slow charging and fast discharging mode). The condition of cycling stability is not clear.

\*\*\*\*The condition of rate performance for KVPF@RGO is 65.5 mA g<sup>-1</sup> for charge and 1.31 A g<sup>-1</sup> for discharge (slow charging and fast discharging mode). The condition of cycling stability is not clear.



- 402 1. Chen, Z.C. et al. One-step Method of Carbon Thermal Reduction and Nitride to Produce  
403 Vanadium Nitrogen Alloy. *Advanced Materials Research* **476**, 194-198 (2012).
- 404 2. Chihara, K., Katogi, A., Kubota, K. & Komaba, S. KVPO<sub>4</sub>F and KVOPO<sub>4</sub> toward 4 volt-class  
405 potassium-ion batteries. *Chemical Communications* **53**, 5208-5211 (2017).
- 406 3. Fedotov, S.S. et al. AVPO<sub>4</sub>F (A= Li, K): a 4 V cathode material for high-power rechargeable  
407 batteries. *Chemistry of Materials* **28**, 411-415 (2016).
- 408 4. Kim, H. et al. A New Strategy for High-Voltage Cathodes for K-Ion Batteries: Stoichiometric  
409 KVPO<sub>4</sub>F. *Advanced Energy Materials* **8**, 1801591 (2018).
- 410 5. He, X.D., Zhang, L.M., Jiang, C.H. & Chen, C.H. Elevating cyclability of an advanced  
411 KVPO<sub>4</sub>F cathode via multi-component coating strategy for high-performance potassium-ion  
412 batteries. *Chemical Engineering Journal* **433**, 134634 (2022).
- 413 6. Kim, H., Tian, Y. & Ceder, G. Origin of Capacity Degradation of High-Voltage KVPO<sub>4</sub>F  
414 Cathode. *Journal of the Electrochemical Society* **167**, 110555 (2020).
- 415 7. Wu, J.F. et al. Building K-C Anode with Ultrahigh Self-Diffusion Coefficient for Solid State  
416 Potassium Metal Batteries Operating at -20 to 120 °C. *Advanced Materials* **35**, 2209833  
417 (2023).
- 418 8. Zanello, P., Nervi, C. & De Biani, F.F. Inorganic electrochemistry: theory, practice and  
419 application, (Royal Society of Chemistry, 2019).
- 420 9. Lu, Y., Zhao, C.Z., Huang, J.Q. & Zhang, Q. The timescale identification decoupling  
421 complicated kinetic processes in lithium batteries. *Joule* **6**, 1172-1198 (2022).
- 422 10. Larbi, L. et al. Enhanced Performance of KVPO<sub>4</sub>F<sub>0.5</sub>O<sub>0.5</sub> in Potassium Batteries by Carbon  
423 Coating Interfaces. *ACS Applied Materials & Interfaces* **15**, 18992-19001 (2023).
- 424 11. Fu, Q. et al. Regulating cathode surface hydroxyl chemistry enables superior potassium  
425 storage. *Proceedings of the National Academy of Sciences of the United States of America*  
426 **120**, e2301622120 (2023).
- 427 12. Xie, C. et al. Pomegranate-Like KVPO<sub>4</sub>F@C Microspheres as High-Volumetric-Energy-  
428 Density Cathode for Potassium-Ion Batteries. *Small* **18**, 2204348 (2022).
- 429 13. Liu, Z.M., Wang, J. & Lu, B.A. Plum pudding model inspired KVPO<sub>4</sub>F@3DC as high-voltage  
430 and hyperstable cathode for potassium ion batteries. *Science Bulletin* **65**, 1242-1251 (2020).
- 431 14. Heng, Y.L. et al. Low-Strain and High-Energy KVPO<sub>4</sub>F Cathode with Multifunctional  
432 Stabilizer for Advanced Potassium-Ion Batteries. *Energy & Environmental Materials*, e12721.
- 433 15. Liao, J.Y. et al. A long lifespan potassium-ion full battery based on KVPO<sub>4</sub>F cathode and  
434 VPO<sub>4</sub> anode. *Journal of Power Sources* **451**, 227739 (2020).
- 435 16. Xu, J. et al. KVPO<sub>4</sub>F/carbon nanocomposite with highly accessible active sites and robust  
436 chemical bonds for advanced potassium-ion batteries. *Green Energy & Environment* **8**, 1469-  
437 1478 (2023).
- 438 17. Liao, J. et al. Synthesis of KVPO<sub>4</sub>F/Carbon Porous Single Crystalline Nanoplates for High-  
439 Rate Potassium-Ion Batteries. *Nano Letters* **22**, 4933-4940 (2022).
- 440 18. Xu, J. et al. Facile synthesis of KVPO<sub>4</sub>F/reduced graphene oxide hybrid as a high-  
441 performance cathode material for potassium-ion batteries. *Journal of Energy Chemistry* **68**,  
442 284-292 (2022).
- 443
